# Supplementary material for: Antagonistic Regulation of ABA Responses by Duplicated Tandemly Repeated DUF538 Protein Genes in Arabidopsis
Source: MDPI journal article supplement (doi:10.3390/plants12162989), 2023-08-19
Supplement: s1 [file s1]

|      |      |            |      |    |                      |                                                                 |
|------|------|------------|------|----|----------------------|-----------------------------------------------------------------|
| ASD1 | ABRE | ACGTG      | 44   | 5+ | Arabidopsis thaliana | cis-acting element involved in the abscisic acid responsiveness |
|      | ABRE | CACGTG     | 85   | 6+ | Arabidopsis thaliana | cis-acting element involved in the abscisic acid responsiveness |
|      | ABRE | ACGTG      | 86   | 5+ | Arabidopsis thaliana | cis-acting element involved in the abscisic acid responsiveness |
|      | ABRE | AACCCGG    | 198  | 7- | Arabidopsis thaliana | cis-acting element involved in the abscisic acid responsiveness |
|      | ABRE | AACCCGG    | 1523 | 7- | Arabidopsis thaliana | cis-acting element involved in the abscisic acid responsiveness |
|      | ABRE | CACGTG     | 1545 | 6- | Arabidopsis thaliana | cis-acting element involved in the abscisic acid responsiveness |
|      | ABRE | ACGTG      | 1546 | 5+ | Arabidopsis thaliana | cis-acting element involved in the abscisic acid responsiveness |
|      | ABRE | CACGTG     | 1875 | 6- | Arabidopsis thaliana | cis-acting element involved in the abscisic acid responsiveness |
|      | ABRE | ACGTG      | 1876 | 5+ | Arabidopsis thaliana | cis-acting element involved in the abscisic acid responsiveness |
|      | ABRE | AACCCGG    | 740  | 7- | Arabidopsis thaliana | cis-acting element involved in the abscisic acid responsiveness |
| ASD2 | ABRE | CACGTG     | 762  | 6- | Arabidopsis thaliana | cis-acting element involved in the abscisic acid responsiveness |
|      | ABRE | ACGTG      | 763  | 5+ | Arabidopsis thaliana | cis-acting element involved in the abscisic acid responsiveness |
|      | ABRE | CACGTG     | 92   | 6+ | Arabidopsis thaliana | cis-acting element involved in the abscisic acid responsiveness |
|      | ABRE | ACGTG      | 93   | 5+ | Arabidopsis thaliana | cis-acting element involved in the abscisic acid responsiveness |
|      | ABRE | GACACGTGGC | 492  | 9- | Triticum aestivum    | cis-acting element involved in the abscisic acid responsiveness |
|      | ABRE | CACGTG     | 494  | 6+ | Arabidopsis thaliana | cis-acting element involved in the abscisic acid responsiveness |
|      | ABRE | ACGTG      | 495  | 5+ | Arabidopsis thaliana | cis-acting element involved in the abscisic acid responsiveness |
|      | ABRE | GACACGTGGC | 947  | 9- | Triticum aestivum    | cis-acting element involved in the abscisic acid responsiveness |
|      | ABRE | CACGTG     | 949  | 6- | Arabidopsis thaliana | cis-acting element involved in the abscisic acid responsiveness |
|      | ABRE | ACGTG      | 950  | 5+ | Arabidopsis thaliana | cis-acting element involved in the abscisic acid responsiveness |
| ASD3 | ABRE | ACGTG      | 643  | 5- | Arabidopsis thaliana | cis-acting element involved in the abscisic acid responsiveness |
|      | ABRE | AACCCGG    | 1247 | 7+ | Arabidopsis thaliana | cis-acting element involved in the abscisic acid responsiveness |
|      | ABRE | CACGTG     | 1823 | 6- | Arabidopsis thaliana | cis-acting element involved in the abscisic acid responsiveness |
|      | ABRE | ACGTG      | 1824 | 5+ | Arabidopsis thaliana | cis-acting element involved in the abscisic acid responsiveness |
|      | ABRE | CACGTG     | 1850 | 6- | Arabidopsis thaliana | cis-acting element involved in the abscisic acid responsiveness |
|      | ABRE | ACGTG      | 1851 | 5+ | Arabidopsis thaliana | cis-acting element involved in the abscisic acid responsiveness |
| ASD4 | ABRE | AACCCGG    | 51   | 7+ | Arabidopsis thaliana | cis-acting element involved in the abscisic acid responsiveness |
|      | ABRE | CACGTG     | 627  | 6+ | Arabidopsis thaliana | cis-acting element involved in the abscisic acid responsiveness |
|      | ABRE | ACGTG      | 628  | 5+ | Arabidopsis thaliana | cis-acting element involved in the abscisic acid responsiveness |
|      | ABRE | CACGTG     | 654  | 6+ | Arabidopsis thaliana | cis-acting element involved in the abscisic acid responsiveness |
|      | ABRE | ACGTG      | 655  | 5+ | Arabidopsis thaliana | cis-acting element involved in the abscisic acid responsiveness |
|      | ABRE | CGCACGTGTC | 1033 | 9- | Hordeum vulgare      | cis-acting element involved in the abscisic acid responsiveness |
|      | ABRE | CACGTG     | 1035 | 6- | Arabidopsis thaliana | cis-acting element involved in the abscisic acid responsiveness |
|      | ABRE | ACGTG      | 1036 | 5+ | Arabidopsis thaliana | cis-acting element involved in the abscisic acid responsiveness |
|      | ABRE | GACACGTGGC | 1933 | 9- | Triticum aestivum    | cis-acting element involved in the abscisic acid responsiveness |
|      | ABRE | CACGTG     | 1935 | 6- | Arabidopsis thaliana | cis-acting element involved in the abscisic acid responsiveness |
|      | ABRE | ACGTG      | 1936 | 5+ | Arabidopsis thaliana | cis-acting element involved in the abscisic acid responsiveness |

**Figure S1.** ABA response elements (ABREs) in the 2000bp promoter region of *ASDs*. ABREs in 2000bp sequences upstream of the start codon of *ASDs* were identified by using PlantCARE (ugent.be).

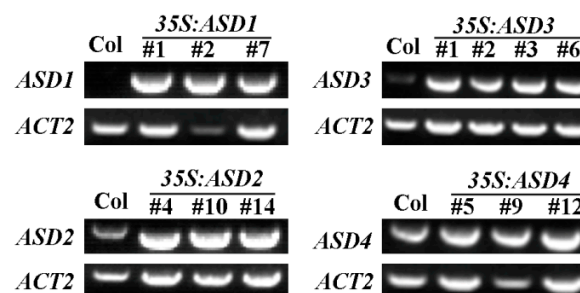

**Figure S2.** Expression of *ASD* genes in the overexpression transgenic plants. Total RNA was isolated from seedlings of the Col wild type and *ASD* overexpression transgenic plants, and used as template for RT-PCR analysis to examine the expression of *ASD* genes. *ACT2* was used as a control.

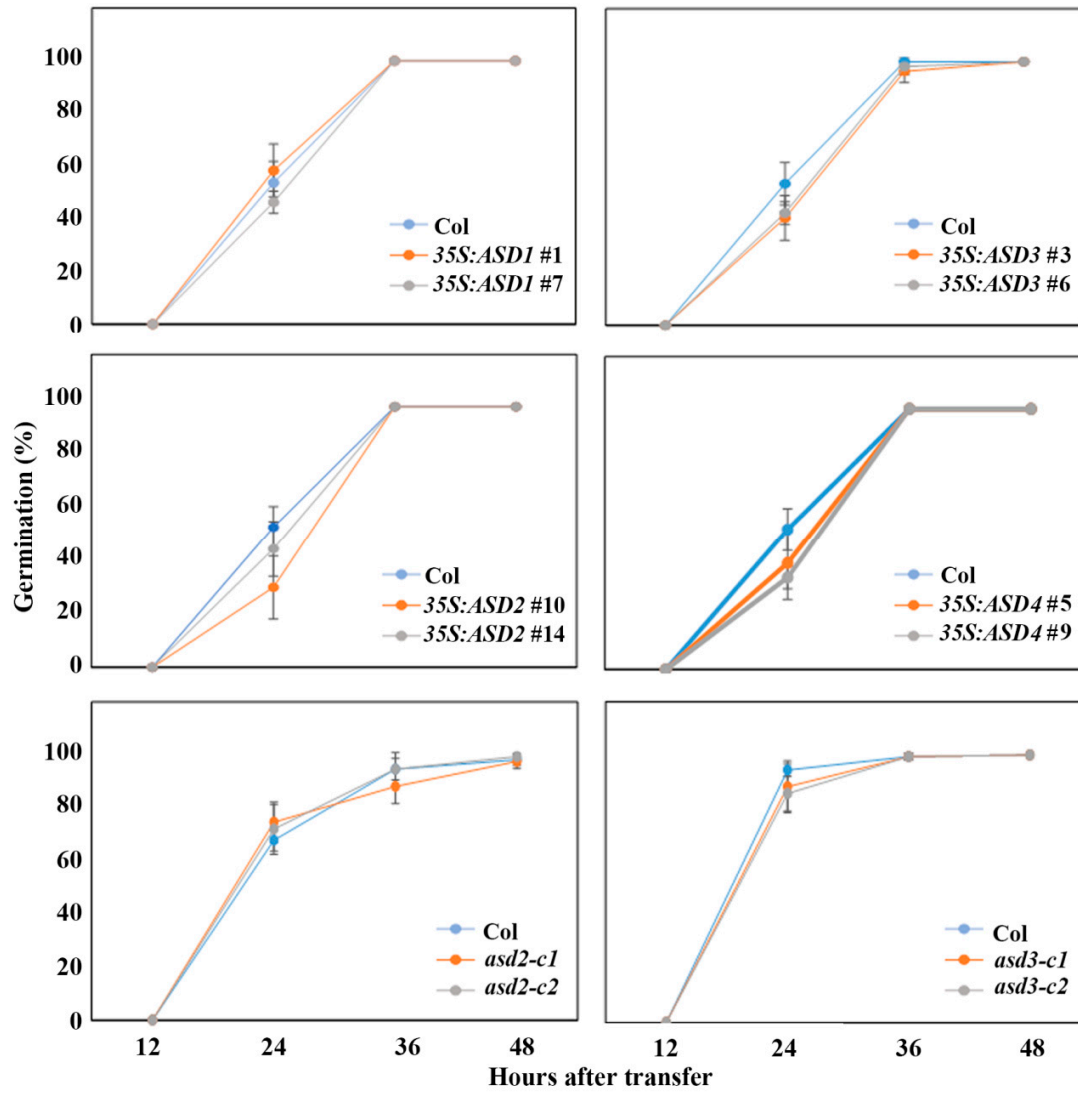

**Figure S3.** Seed germination of the Col wild type, the 35S:ASD transgenic plants and single mutants *asd2* and *asd3* in control plates as indicated in Figure 4 and Figure 7A respectively.

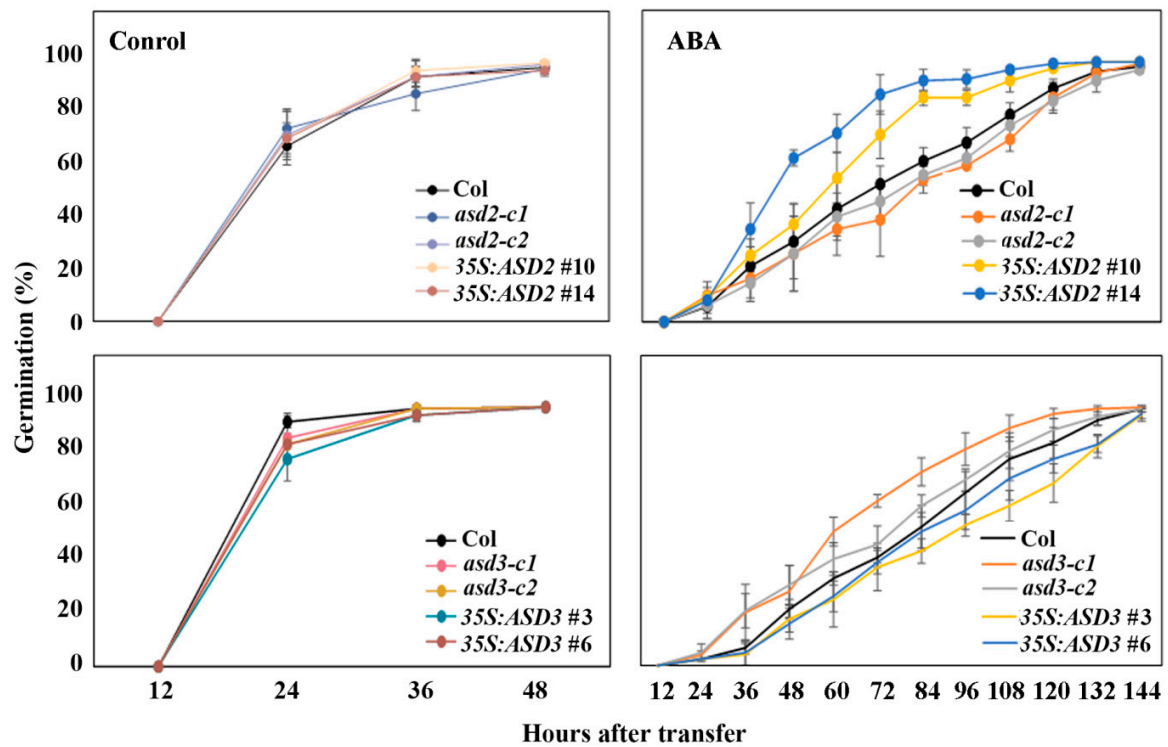

**Figure S4.** Effects of ABA on seed germination of the Col wild type, the 35S:*ASD2* and 35S:*ASD3* transgenic plants and the *asd2* and *asd3* mutants. The experiments were performed as indicated in Figure 4 and Figure 7A except that 2  $\mu$ M ABA was used for the experiments.

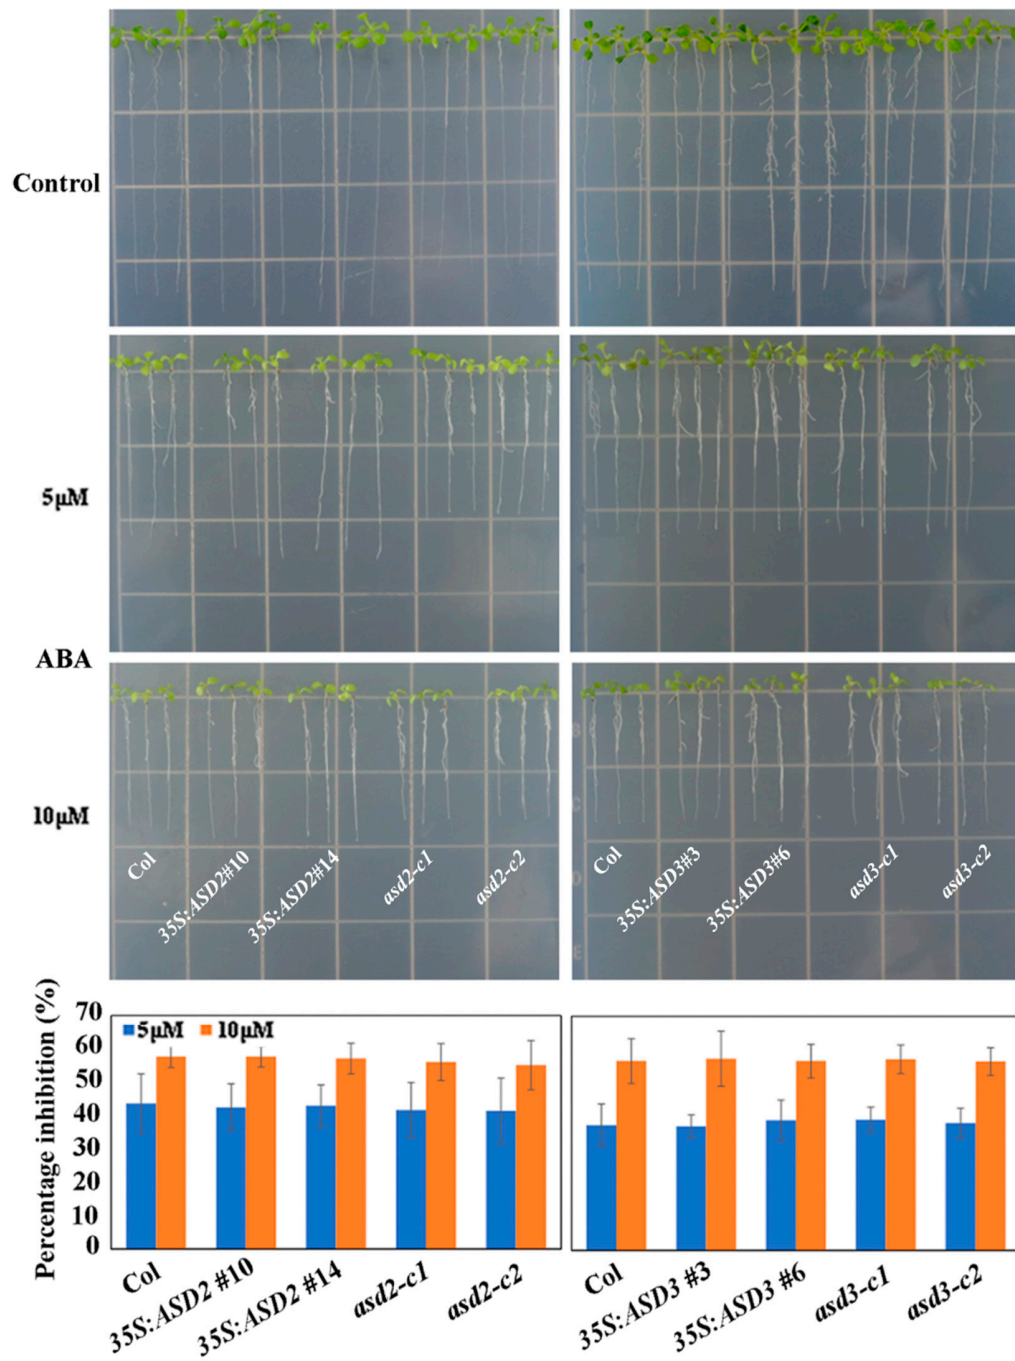

**Figure S5.** Effects of ABA on root elongation of the Col wild type, the *35S:ASD2* and *35S:ASD3* transgenic plants and the *asd2* and *asd3* mutants. Sterilized seeds were sown on 1/2 MS plates kept at 4 °C in darkness for 2 days and then transferred to a growth room grow vertically for 3 days, then seedlings were transferred into plates with or without ABA, and grow vertically for 5 day. Root length were measured before and 5 days after the transferred, percentage inhibition were calculated. Data represent the mean  $\pm$  SD of 12-25 seedlings.
