# Supplementary material for: Antagonistic Regulation of ABA Responses by Duplicated Tandemly Repeated DUF538 Protein Genes in Arabidopsis
Source: Plants (Basel). 2023 Aug 19;12(16):2989. doi: 10.3390/plants12162989 (PMC10459309; doi:10.3390/plants12162989)
Supplement: Supplementary file 1 [file plants-12-02989-s001.zip › Table S1.xls]

## Sheet: Down-regulated genes in OE line
Gene ID	Gene Symbol	Other Symbols	Type	log2 (OE / Col)	Qvalue (OE / Col)	Col_1 TPM	Col_2 TPM	Col_3 TPM	M4_1 TPM	M4_2 TPM	M4_3 TPM	OE10_1 TPM	OE10_2 TPM	OE10_3 TPM	Col Average TPM	OE Average TPM	Mutant Average TPM	KEGG Pathway Desc	GO_F Desc
AT3G31540	'AT3G31540.1'		mRNA	-10.9313	2.89776e-16	11.4	9.76	11	0	0	0	0	0	0	10.72	0	0
AT3G25820	'AT3G25820.2'		mRNA	-9.982	1.08979e-12	7.12	3.62	7.16	0	18.14	3.54	0	0	0	5.96667	0	7.22667	00902///Monoterpenoid biosynthesis	GO:0000287///magnesium ion binding+++GO:0010333///terpene synthase activity+++GO:0102313///1,8-cineole synthase activity
AT3G05170	'AT3G05170.1'		mRNA	-5.73204	1.29551e-12	5.23	4.59	4.25	0	0.05	0.05	0.16	0.05	0.05	4.69	0.0866667	0.0333333		GO:0016791///phosphatase activity
AT1G67626	'AT1G67626.1'		mRNA	-4.53212	0.0172188	2.67	1.77	2.3	0.43	0	0.28	0	0.29	0	2.24667	0.0966667	0.236667	03040///Spliceosome+++04141///Protein processing in endoplasmic reticulum+++04144///Endocytosis+++04213///Longevity regulating pathway - multiple species	GO:0003676///nucleic acid binding+++GO:0004523///RNA-DNA hybrid ribonuclease activity+++GO:0046872///metal ion binding
AT1G43590	'AT1G43590.1'		mRNA	-3.66239	3.76295e-12	15.74	17.6	21.74	2.98	2.35	1.66	0.43	2.17	1.66	18.36	1.42	2.33	00260///Glycine, serine and threonine metabolism+++00270///Cysteine and methionine metabolism+++00680///Methane metabolism+++00750///Vitamin B6 metabolism+++01200///Carbon metabolism+++01230///Biosynthesis of amino acids+++01240///Biosynthesis of cofactors	GO:0016788///hydrolase activity, acting on ester bonds
AT5G65080	'AT5G65080.2'		mRNA	-3.47081	1.26115e-11	4.89	5.05	6.08	3.37	3.5	2.64	0.29	0.51	0.63	5.34	0.476667	3.17		GO:0000978///RNA polymerase II proximal promoter sequence-specific DNA binding+++GO:0000981///DNA-binding transcription factor activity, RNA polymerase II-specific+++GO:0003700///DNA-binding transcription factor activity+++GO:0046983///protein dimerization activity
AT5G10140	'AT5G10140.4'		mRNA	-2.75964	0.0415222	0.71	1.72	2.01	2.18	1.21	0.79	0.25	0.35	0.08	1.48	0.226667	1.39333		GO:0000976///transcription regulatory region sequence-specific DNA binding+++GO:0000978///RNA polymerase II proximal promoter sequence-specific DNA binding+++GO:0000981///DNA-binding transcription factor activity, RNA polymerase II-specific+++GO:0003700///DNA-binding transcription factor activity+++GO:0046983///protein dimerization activity
AT3G29120	'AT3G29120.1'		mRNA	-2.29384	0.00264612	3.73	4.03	3.68	0.62	1.11	0.95	0.75	1.01	0.48	3.81333	0.746667	0.893333		GO:0003677///DNA binding+++GO:0046872///metal ion binding+++GO:0046983///protein dimerization activity
AT4G15248	'AT4G15248.1'		mRNA	-2.28819	0.00729136	8.3	6.75	3.77	0.99	0.99	0.77	1.21	1.82	0.77	6.27333	1.26667	0.916667		GO:0008270///zinc ion binding+++GO:0030674///protein binding, bridging
AT2G30766	'AT2G30766.2'		mRNA	-2.07198	0.00744812	42.18	20.74	18.9	29.14	10.6	10.18	2.33	13.19	4.74	27.2733	6.75333	16.64
AT3G09450	'AT3G09450.1'		mRNA	-2.01934	2.68942e-09	2.79	2.67	2.63	0.66	1.05	0.75	0.61	0.83	0.54	2.69667	0.66	0.82		GO:0022857///transmembrane transporter activity
AT2G46790	'AT2G46790.2'		mRNA	-1.66005	5.0489e-11	6.89	8.05	8.71	1.43	1.63	1.36	2.39	3.06	1.98	7.88333	2.47667	1.47333	04712///Circadian rhythm - plant	GO:0003677///DNA binding
AT5G18030	'AT5G18030.1'		mRNA	-1.61769	5.87896e-05	14.87	16.03	15.74	8.18	3.67	8.7	5.67	4.4	5.05	15.5467	5.04	6.85	04075///Plant hormone signal transduction
AT3G44450	'AT3G44450.1'		mRNA	-1.61604	3.06453e-07	29.19	23.13	19.05	4.45	4.62	5.77	8	8.22	6.75	23.79	7.65667	4.94667
AT4G13500	'AT4G13500.1'		mRNA	-1.50672	9.00619e-13	116.94	97.37	117.05	36.73	40.87	51.96	34.33	35.38	45.06	110.453	38.2567	43.1867
AT3G18660	'AT3G18660.3'		mRNA	-1.48484	0.00161739	1.73	1.68	1.65	0.64	0.85	0.44	0.63	0.49	0.66	1.68667	0.593333	0.643333
AT2G40610	'AT2G40610.1'		mRNA	-1.48346	1.68876e-09	78.64	49.51	72.05	25.83	28.72	30.8	24.56	27.81	19.18	66.7333	23.85	28.45
AT1G19250	'AT1G19250.1'		mRNA	-1.34801	0.00564093	19.53	7.81	11.01	9.51	8.58	3.11	6.17	5.73	3.25	12.7833	5.05	7.06667		GO:0004499///N,N-dimethylaniline monooxygenase activity+++GO:0031543///peptidyl-proline dioxygenase activity+++GO:0050660///flavin adenine dinucleotide binding+++GO:0050661///NADP binding+++GO:0062047///pipecolic acid N-hydroxylase
AT5G18020	'AT5G18020.1'		mRNA	-1.3344	0.0361396	11.72	13.83	15.87	6.25	2.24	6.33	6.8	7.04	2.62	13.8067	5.48667	4.94	04075///Plant hormone signal transduction
AT1G76240	'AT1G76240.1'		mRNA	-1.33167	0.0185576	7.47	4.46	4.06	3.17	2.84	3.93	2.42	2.56	1.35	5.33	2.11	3.31333
AT2G15020	'AT2G15020.1'		mRNA	-1.3242	1.18292e-11	15.82	20.98	13.88	4.43	4.33	2.4	6.42	7.63	5.85	16.8933	6.63333	3.72
AT3G47500	'AT3G47500.1'		mRNA	-1.26771	1.99139e-16	29.2	36.62	31.38	13.45	10.68	10.96	11.89	15.02	12.85	32.4	13.2533	11.6967	04712///Circadian rhythm - plant	GO:0003677///DNA binding+++GO:0003700///DNA-binding transcription factor activity+++GO:0046872///metal ion binding
AT1G20190	'AT1G20190.1'		mRNA	-1.20337	3.03496e-09	54.05	46.54	43.83	26.52	26.2	41.22	18.9	26.06	17.18	48.14	20.7133	31.3133
AT5G54585	'AT5G54585.1'		mRNA	-1.18605	0.0138807	9.59	7.32	9.08	6.53	7.77	8.12	3.46	4.76	3.12	8.66333	3.78	7.47333
AT1G29460	'AT1G29460.1'		mRNA	-1.16524	0.0474717	10.5	9.27	12.13	4.4	5.25	4.97	3.01	6.49	4.56	10.6333	4.68667	4.87333
AT4G29110	'AT4G29110.1'		mRNA	-1.14483	0.0101619	6.25	9.72	5.93	3.55	2.86	5	3.06	3.77	2.87	7.3	3.23333	3.80333
AT3G29030	'AT3G29030.1'		mRNA	-1.09161	0.000415278	11.16	10.7	10.45	9.08	9.24	7.98	4.26	6.81	3.96	10.77	5.01	8.76667
AT3G13980	'AT3G13980.1'		mRNA	-1.07439	0.0325844	5.67	4.99	4.9	6.67	4.72	4.11	1.98	3.54	1.81	5.18667	2.44333	5.16667
AT3G15550	'AT3G15550.1'		mRNA	-1.06396	0.0146307	7.03	6.69	4.76	8.69	8.93	5.93	2.83	4.22	1.76	6.16	2.93667	7.85
AT4G38860	'AT4G38860.1'		mRNA	-1.05269	1.59253e-06	57.88	50.34	59.04	32.12	26.77	36.1	23.76	32.75	23.42	55.7533	26.6433	31.6633	04075///Plant hormone signal transduction
AT1G74670	'AT1G74670.1'		mRNA	-1.05258	0.000240243	367.18	233.78	362.98	349.46	275.96	412.05	147.95	191.88	124.27	321.313	154.7	345.823	00563///Glycosylphosphatidylinositol (GPI)-anchor biosynthesis
AT5G23240	'AT5G23240.1'		mRNA	-0.98752	6.72026e-05	29.06	55.36	36.39	22.61	25.28	22.56	20.64	19.7	19.27	40.27	19.87	23.4833	00061///Fatty acid biosynthesis+++01212///Fatty acid metabolism
AT4G33040	'AT4G33040.1'		mRNA	-0.973218	0.00108566	18.84	17.78	15.71	3.81	3.69	7.09	10.33	7.18	8.74	17.4433	8.75	4.86333		GO:0015035///protein disulfide oxidoreductase activity
AT2G37770	'AT2G37770.2'		mRNA	-0.951989	0.00942619	11.63	9.05	12.43	3.04	8.07	4.09	6.79	6.15	4.14	11.0367	5.69333	5.06667	00010///Glycolysis / Gluconeogenesis+++00040///Pentose and glucuronate interconversions+++00053///Ascorbate and aldarate metabolism+++00561///Glycerolipid metabolism+++00620///Pyruvate metabolism+++01240///Biosynthesis of cofactors	GO:0004032///alditol:NADP+ 1-oxidoreductase activity+++GO:0004033///aldo-keto reductase (NADP) activity+++GO:0008106///alcohol dehydrogenase (NADP+) activity+++GO:0016229///steroid dehydrogenase activity+++GO:0047834///D-threo-aldose 1-dehydrogenase activity+++GO:0070401///NADP+ binding
AT5G54470	'AT5G54470.1'		mRNA	-0.948767	0.0127501	6.29	6.83	7.28	4.42	2.69	2.05	3.05	4	3.39	6.8	3.48	3.05333		GO:0000976///transcription regulatory region sequence-specific DNA binding+++GO:0003700///DNA-binding transcription factor activity+++GO:0008270///zinc ion binding
AT4G19170	'AT4G19170.1'		mRNA	-0.943878	2.81989e-09	57.78	78.98	63.49	28.84	41.73	24.6	31.44	39.45	31.62	66.75	34.17	31.7233	00906///Carotenoid biosynthesis	GO:0010436///carotenoid dioxygenase activity+++GO:0046872///metal ion binding
AT1G69530	'AT1G69530.5'		mRNA	-0.943036	5.26406e-08	275.55	237.91	212.73	116.92	123.96	105.67	124.09	147.3	102.93	242.063	124.773	115.517
AT4G09500	'AT4G09500.2'		mRNA	-0.917649	0.0185576	6.47	8.45	10.58	5.21	4.2	4.23	3.77	4.4	5.15	8.5	4.44	4.54667	00942///Anthocyanin biosynthesis	GO:0008194///UDP-glycosyltransferase activity
AT1G79110	'AT1G79110.2'		mRNA	-0.883523	2.82664e-07	24.5	23.44	22.92	14.03	10.29	13.22	14.36	11.65	11.98	23.62	12.6633	12.5133		GO:0004842///ubiquitin-protein transferase activity+++GO:0046872///metal ion binding
AT2G03310	'AT2G03310.1'		mRNA	-0.882594	1.76247e-06	28.72	36.16	30.26	16.83	18.16	19.39	16.28	17.99	16.43	31.7133	16.9	18.1267
AT4G27310	'AT4G27310.1'		mRNA	-0.882018	5.24571e-07	70.51	65.15	61.48	36.45	32.73	41.36	30.09	40.07	35.34	65.7133	35.1667	36.8467
AT5G48900	'AT5G48900.1'		mRNA	-0.864576	0.00388733	26.37	24.66	24.28	16.24	16.99	19.79	11.26	18.98	10.8	25.1033	13.68	17.6733	00040///Pentose and glucuronate interconversions	GO:0030570///pectate lyase activity+++GO:0046872///metal ion binding
AT3G12320	'AT3G12320.1'		mRNA	-0.862072	2.68459e-06	67.26	59.32	61.92	17.19	24.52	23.67	29.4	39.05	34.04	62.8333	34.1633	21.7933
AT2G40475	'AT2G40475.1'		mRNA	-0.85558	0.00845498	9.36	7.88	8.24	5.63	3.4	6.07	4.79	4.14	4.97	8.49333	4.63333	5.03333
AT1G18330	'AT1G18330.2'		mRNA	-0.847626	0.000587819	24.88	24.37	30.89	22.72	18	17.79	13.26	17.88	13.13	26.7133	14.7567	19.5033	04712///Circadian rhythm - plant	GO:0003677///DNA binding+++GO:0003700///DNA-binding transcription factor activity
AT3G61550	'AT3G61550.1'		mRNA	-0.838145	0.017323	12.48	13.74	12.87	14.45	10.78	10.03	6.93	9.02	5.67	13.03	7.20667	11.7533		GO:0016740///transferase activity+++GO:0046872///metal ion binding
AT3G24500	'AT3G24500.2'		mRNA	-0.837652	0.00525105	29.42	29.06	22.85	9.54	10.84	11.38	12.99	17.48	14.21	27.11	14.8933	10.5867		GO:0003677///DNA binding+++GO:0003700///DNA-binding transcription factor activity+++GO:0003713///transcription coactivator activity
AT4G17340	'AT4G17340.1'		mRNA	-0.828339	0.000114263	80.03	83.46	52.38	60.81	75.62	62.95	42.23	41.32	35.88	71.9567	39.81	66.46		GO:0015250///water channel activity
AT5G11420	'AT5G11420.1'		mRNA	-0.827649	0.000810391	99.71	80.69	100.27	72.71	81.91	89.07	50.37	66.36	40.97	93.5567	52.5667	81.23	03008///Ribosome biogenesis in eukaryotes+++04139///Mitophagy - yeast+++04712///Circadian rhythm - plant
AT1G75780	'AT1G75780.1'		mRNA	-0.811076	0.0102631	14.15	20.65	16.58	11.19	12.09	7.69	10.24	12.07	6.67	17.1267	9.66	10.3233	04145///Phagosome	GO:0003729///mRNA binding+++GO:0003924///GTPase activity+++GO:0005200///structural constituent of cytoskeleton+++GO:0005525///GTP binding
AT4G16880	'AT4G16880.1'		mRNA	-0.809087	0.00749947	20.54	22.36	20.23	11.67	10.95	13.55	8.73	13.98	12.69	21.0433	11.8	12.0567	04626///Plant-pathogen interaction
AT4G35720	'AT4G35720.1'		mRNA	-0.807897	0.0189502	11.47	10.83	10.35	8.01	5.2	6.08	5.01	7.98	5.46	10.8833	6.15	6.43
AT1G16500	'AT1G16500.1'		mRNA	-0.80218	0.0167295	9.87	10.57	8.7	5.11	5.01	6.15	6.44	5.53	4.53	9.71333	5.5	5.42333
AT1G22770	'AT1G22770.1'		mRNA	-0.786012	0.000273685	8.6	13.35	11.51	6.29	6.43	5.9	6.3	6.94	5.89	11.1533	6.37667	6.20667	04712///Circadian rhythm - plant
AT1G06080	'AT1G06080.1'		mRNA	-0.785143	0.0282414	19.46	21.54	24.66	18.57	14.58	11.45	12.02	16.99	8.92	21.8867	12.6433	14.8667		GO:0009979///16:0 monogalactosyldiacylglycerol desaturase activity+++GO:0016717///oxidoreductase activity, acting on paired donors, with oxidation of a pair of donors resulting in the reduction of molecular oxygen to two molecules of water
AT1G26945	'AT1G26945.1'		mRNA	-0.762233	0.0192903	43.26	36.28	34.16	21.54	15.88	19.83	19.32	28.6	18.39	37.9	22.1033	19.0833		GO:0046983///protein dimerization activity
AT1G68050	'AT1G68050.1'		mRNA	-0.760128	0.000843837	8.79	12.35	10.66	8.64	9.14	8.37	5.98	6.03	6.45	10.6	6.15333	8.71667	04712///Circadian rhythm - plant	GO:0009881///photoreceptor activity
AT1G71030	'AT1G71030.1'		mRNA	-0.757227	0.000114736	138.15	138.12	170.78	78.48	73.38	91.22	81.14	99.53	81.51	149.017	87.3933	81.0267		GO:0000976///transcription regulatory region sequence-specific DNA binding+++GO:0003700///DNA-binding transcription factor activity
AT2G39705	'AT2G39705.1'		mRNA	-0.7549	0.000795155	30.27	36.3	36.6	20.85	15.93	22.18	20.31	22.22	17.78	34.39	20.1033	19.6533
AT2G37640	'AT2G37640.1'		mRNA	-0.742846	0.00649599	83.71	76.01	82.85	49.77	46.58	46.96	41.09	63.98	38.88	80.8567	47.9833	47.77
AT5G04950	'AT5G04950.1'		mRNA	-0.742145	0.0335985	37.21	38.5	23.2	23.01	15.63	11.91	21.91	22.58	13.89	32.97	19.46	16.85	00270///Cysteine and methionine metabolism+++00999///Biosynthesis of various plant secondary metabolites	GO:0030410///nicotianamine synthase activity
AT5G64770	'AT5G64770.1'		mRNA	-0.737431	1.87655e-05	89.08	97.48	106.3	55.86	48.99	75.04	58.9	58.45	55.66	97.62	57.67	59.9633		GO:0005179///hormone activity+++GO:0008083///growth factor activity
AT1G70420	'AT1G70420.1'		mRNA	-0.734021	0.0245746	11.02	9.83	10.69	6.28	6.83	8.19	6.36	7.41	5.06	10.5133	6.27667	7.1		GO:0016874///ligase activity
AT1G63840	'AT1G63840.1'		mRNA	-0.726005	0.000831445	25.6	24.03	19.41	9.98	14.32	8.25	15.09	13.91	12.22	23.0133	13.74	10.85		GO:0061630///ubiquitin protein ligase activity
AT5G03230	'AT5G03230.1'		mRNA	-0.724868	0.00845498	48.49	48.94	42.31	26.64	26.1	20.52	26.24	36.29	21.13	46.58	27.8867	24.42
AT4G04330	'AT4G04330.1'		mRNA	-0.724157	0.0273208	30.27	45.68	32.87	41.84	42	52.12	17.26	23.73	23.21	36.2733	21.4	45.32		GO:0044183///protein binding involved in protein folding
AT3G30180	'AT3G30180.1'		mRNA	-0.716713	0.00259834	15.85	20.54	13.66	8.98	9.64	6.58	10.87	10.95	8.18	16.6833	10	8.4	00905///Brassinosteroid biosynthesis	GO:0004497///monooxygenase activity+++GO:0005506///iron ion binding+++GO:0016491///oxidoreductase activity+++GO:0016705///oxidoreductase activity, acting on paired donors, with incorporation or reduction of molecular oxygen+++GO:0020037///heme binding
AT5G02890	'AT5G02890.1'		mRNA	-0.71537	0.0185576	11.32	11.44	11.79	7.49	8.18	6.49	5.8	7.51	7.43	11.5167	6.91333	7.38667		GO:0016747///transferase activity, transferring acyl groups other than amino-acyl groups
AT3G09440	'AT3G09440.2'		mRNA	-0.715059	4.45908e-05	130.25	148.67	103.65	42.19	50.53	31.91	80.43	86.07	63.38	127.523	76.6267	41.5433	03040///Spliceosome+++04141///Protein processing in endoplasmic reticulum+++04144///Endocytosis+++04213///Longevity regulating pathway - multiple species	GO:0002020///protease binding+++GO:0003729///mRNA binding+++GO:0005524///ATP binding+++GO:0016887///ATPase activity+++GO:0031072///heat shock protein binding+++GO:0044183///protein binding involved in protein folding+++GO:0051082///unfolded protein binding+++GO:0051787///misfolded protein binding
AT4G23400	'AT4G23400.1'		mRNA	-0.705572	7.83979e-10	223.46	263.19	254.36	197.47	213.71	219.85	155.74	156.16	136.9	247.003	149.6	210.343		GO:0015250///water channel activity
AT3G14200	'AT3G14200.1'		mRNA	-0.679539	0.00274726	17.25	19.19	14.36	6.82	6.52	5.18	9.7	10.74	10.71	16.9333	10.3833	6.17333	04141///Protein processing in endoplasmic reticulum
AT1G11700	'AT1G11700.1'		mRNA	-0.676741	0.0433063	28.28	33.75	31.74	17.12	11.81	13.54	25.41	15.02	17.47	31.2567	19.3	14.1567
AT1G78600	'AT1G78600.2'		mRNA	-0.663954	2.6144e-05	39.6	40.27	40.85	41.66	31.72	38.59	26.17	27.55	21.65	40.24	25.1233	37.3233	00500///Starch and sucrose metabolism	GO:0008270///zinc ion binding
AT1G69160	'AT1G69160.1'		mRNA	-0.656099	0.00240844	43.63	45.34	50.84	40.27	31.95	31.95	30.64	34.04	23.5	46.6033	29.3933	34.7233
AT5G22580	'AT5G22580.1'		mRNA	-0.652008	1.41443e-05	323.31	336.45	331.39	219.89	197.23	278.39	192.27	240.45	189.28	330.383	207.333	231.837		GO:0046872///metal ion binding
AT5G10430	'AT5G10430.1'		mRNA	-0.649916	0.0287675	23.45	19.89	21.28	21.2	19.7	17.17	14.57	14.15	12.06	21.54	13.5933	19.3567	00940///Phenylpropanoid biosynthesis
AT5G59780	'AT5G59780.3'		mRNA	-0.644459	0.00525105	122.67	117.39	82.26	55.77	59.71	47.1	72.08	74.32	57.5	107.44	67.9667	54.1933		GO:0000976///transcription regulatory region sequence-specific DNA binding+++GO:0003700///DNA-binding transcription factor activity+++GO:0043565///sequence-specific DNA binding
AT1G73120	'AT1G73120.1'		mRNA	-0.641165	0.00729136	80.91	79.71	58.58	114.5	79.66	119.3	44.72	46.02	46.88	73.0667	45.8733	104.487
AT2G30070	'AT2G30070.1'		mRNA	-0.629712	0.00207584	14.69	18.57	14.93	11.07	11.04	8.56	10.43	11.88	8.46	16.0633	10.2567	10.2233		GO:0015079///potassium ion transmembrane transporter activity
AT5G43440	'AT5G43440.2'		mRNA	-0.627767	4.74381e-05	31.18	36.11	31.82	30.24	27.52	33.27	20.79	23.14	19.45	33.0367	21.1267	30.3433	00402///Benzoxazinoid biosynthesis	GO:0009815///1-aminocyclopropane-1-carboxylate oxidase activity+++GO:0046872///metal ion binding
AT3G12610	'AT3G12610.1'		mRNA	-0.623165	0.000258323	74.67	75.66	79.83	49.17	44.96	47.42	49.08	57.1	42.02	76.72	49.4	47.1833	04016///MAPK signaling pathway - plant+++04626///Plant-pathogen interaction	GO:0000166///nucleotide binding
AT4G12320	'AT4G12320.1'		mRNA	-0.62006	0.0127333	19.38	29.44	19.51	12.1	15.22	10.9	14.46	15.61	13.58	22.7767	14.55	12.74		GO:0004497///monooxygenase activity+++GO:0005506///iron ion binding+++GO:0016705///oxidoreductase activity, acting on paired donors, with incorporation or reduction of molecular oxygen+++GO:0020037///heme binding
AT2G19650	'AT2G19650.1'		mRNA	-0.611484	0.00688784	8.21	10.64	8.51	5.15	4.23	3.21	6.49	6.1	5.09	9.12	5.89333	4.19667
AT5G15950	'AT5G15950.2'		mRNA	-0.607913	1.3549e-06	45.06	47.82	44.01	16.51	17.75	13.16	29.41	28.96	30.19	45.63	29.52	15.8067	00270///Cysteine and methionine metabolism+++00330///Arginine and proline metabolism	GO:0004014///adenosylmethionine decarboxylase activity
AT3G26290	'AT3G26290.1'		mRNA	-0.599047	6.94781e-08	64.54	68.46	65.23	28.81	28.43	29.08	44.43	45.27	39.7	66.0767	43.1333	28.7733		GO:0004497///monooxygenase activity+++GO:0005506///iron ion binding+++GO:0016705///oxidoreductase activity, acting on paired donors, with incorporation or reduction of molecular oxygen+++GO:0020037///heme binding
AT2G46880	'AT2G46880.2'		mRNA	-0.59582	0.0273208	14.36	13.65	14.1	5.03	5.14	4.04	9.13	11.02	7.53	14.0367	9.22667	4.73667		GO:0003993///acid phosphatase activity+++GO:0016788///hydrolase activity, acting on ester bonds+++GO:0046872///metal ion binding
AT4G32460	'AT4G32460.2'		mRNA	-0.593613	0.0412909	78.54	70.11	80.36	40.9	41.46	48.5	44.8	65.18	41.34	76.3367	50.44	43.62	03008///Ribosome biogenesis in eukaryotes+++04139///Mitophagy - yeast+++04712///Circadian rhythm - plant
AT2G21210	'AT2G21210.1'		mRNA	-0.592887	0.0284844	68.48	62.31	46.16	33.6	36.46	34.42	36.94	41.04	37.3	58.9833	38.4267	34.8267	04075///Plant hormone signal transduction
AT2G45560	'AT2G45560.2'		mRNA	-0.591324	0.00286526	18.42	17.84	22.02	14.62	14.54	11.59	12.32	13.2	12.42	19.4267	12.6467	13.5833		GO:0004497///monooxygenase activity+++GO:0005506///iron ion binding+++GO:0016705///oxidoreductase activity, acting on paired donors, with incorporation or reduction of molecular oxygen+++GO:0020037///heme binding
AT5G02810	'AT5G02810.1'		mRNA	-0.584139	0.0379667	31.88	39.17	40.72	49.88	38.73	42.18	20.22	30.32	23.21	37.2567	24.5833	43.5967	04712///Circadian rhythm - plant	GO:0003677///DNA binding
AT3G25717	'AT3G25717.1'		mRNA	-0.564916	0.00317746	71.24	75.28	75.22	70.13	56.8	69.07	53.78	48.69	45.12	73.9133	49.1967	65.3333
AT2G43060	'AT2G43060.1'		mRNA	-0.561656	0.00256142	36.38	41.73	32.89	30.84	18.87	21.6	25.61	25.71	22.67	37	24.6633	23.77		GO:0046983///protein dimerization activity
AT2G34420	'AT2G34420.1'		mRNA	-0.560925	0.0252998	11929	9862.16	13453.3	12416.5	9418.59	10089.8	7400.73	8825.75	7513.21	11748.1	7913.23	10641.6	00196///Photosynthesis - antenna proteins	GO:0003729///mRNA binding+++GO:0016168///chlorophyll binding+++GO:0019904///protein domain specific binding
AT5G41400	'AT5G41400.1'		mRNA	-0.559036	0.0474855	19.34	23.74	20.05	11.68	11.75	11.54	13.97	14.77	13.38	21.0433	14.04	11.6567		GO:0061630///ubiquitin protein ligase activity
AT2G31380	'AT2G31380.1'		mRNA	-0.558944	0.00572072	70.96	70.18	66.11	39.09	44.79	35.83	43.65	55.88	39.68	69.0833	46.4033	39.9033	00500///Starch and sucrose metabolism	GO:0003700///DNA-binding transcription factor activity+++GO:0008270///zinc ion binding
AT4G12290	'AT4G12290.1'		mRNA	-0.558586	1.44931e-07	59.07	68.19	57.13	21.7	24.13	25.97	43.35	41.99	38.21	61.4633	41.1833	23.9333	00260///Glycine, serine and threonine metabolism+++00350///Tyrosine metabolism+++00360///Phenylalanine metabolism+++00410///beta-Alanine metabolism+++00950///Isoquinoline alkaloid biosynthesis+++00960///Tropane, piperidine and pyridine alkaloid biosynthesis	GO:0005507///copper ion binding+++GO:0008131///primary amine oxidase activity+++GO:0048038///quinone binding+++GO:0052593///tryptamine:oxygen oxidoreductase (deaminating) activity+++GO:0052594///aminoacetone:oxygen oxidoreductase(deaminating) activity+++GO:0052595///aliphatic-amine oxidase activity+++GO:0052596///phenethylamine:oxygen oxidoreductase (deaminating) activity
AT4G36220	'AT4G36220.1'		mRNA	-0.552024	0.00428756	87.99	83.12	66.85	41.82	52.48	39.69	49.11	60.43	50.53	79.32	53.3567	44.6633	00940///Phenylpropanoid biosynthesis	GO:0004497///monooxygenase activity+++GO:0005506///iron ion binding+++GO:0016705///oxidoreductase activity, acting on paired donors, with incorporation or reduction of molecular oxygen+++GO:0020037///heme binding
AT1G75380	'AT1G75380.3'		mRNA	-0.551884	3.55982e-08	373.1	386.33	337.73	235.74	254.07	264.41	244.59	248.6	244.49	365.72	245.893	251.407		GO:0004518///nuclease activity
AT1G06460	'AT1G06460.1'		mRNA	-0.542146	0.0249493	83.64	111.6	107.93	88.12	89.06	85.92	66.01	62.69	75.84	101.057	68.18	87.7
AT1G13245	'AT1G13245.1'		mRNA	-0.541465	0.0141103	453.65	407.58	517.29	343.33	325.97	377.32	305.89	339.83	291.46	459.507	312.393	348.873
AT4G32340	'AT4G32340.1'		mRNA	-0.537066	0.00527592	70.43	87.32	68.1	80.18	84.25	75.08	48.6	59.24	45.3	75.2833	51.0467	79.8367
AT1G69830	'AT1G69830.1'		mRNA	-0.536439	0.027869	38.05	49.68	46.19	41.47	40.16	45.38	25.5	32.89	32.47	44.64	30.2867	42.3367	00500///Starch and sucrose metabolism	GO:0004556///alpha-amylase activity+++GO:0005509///calcium ion binding+++GO:0103025///alpha-amylase activity (releasing maltohexaose)
AT3G46640	'AT3G46640.3'		mRNA	-0.534891	0.0116633	23.25	28.39	26.84	22.91	20.28	19.83	17.94	20.33	15.42	26.16	17.8967	21.0067	04075///Plant hormone signal transduction	GO:0003677///DNA binding+++GO:0003700///DNA-binding transcription factor activity
AT5G64170	'AT5G64170.2'		mRNA	-0.533676	5.92078e-05	32.47	34.38	32.61	16.74	18.08	17.25	21.95	24.87	21.34	33.1533	22.72	17.3567
AT2G23840	'AT2G23840.1'		mRNA	-0.531427	0.00215215	37.73	37.36	37.68	22.57	23.58	26.61	25.29	27.01	24.76	37.59	25.6867	24.2533		GO:0004519///endonuclease activity
AT1G78070	'AT1G78070.1'		mRNA	-0.530089	0.0116633	11.64	11.33	10.84	7.79	9.74	6.81	7.43	8.1	7.6	11.27	7.71	8.11333
AT4G15490	'AT4G15490.1'		mRNA	-0.52959	0.00308729	27.04	25.74	23.96	19.8	17.72	16.45	16.27	18.63	17.57	25.58	17.49	17.99	00999///Biosynthesis of various plant secondary metabolites	GO:0047218///hydroxycinnamate 4-beta-glucosyltransferase activity+++GO:0050284///sinapate 1-glucosyltransferase activity+++GO:0050412///cinnamate beta-D-glucosyltransferase activity+++GO:0080043///quercetin 3-O-glucosyltransferase activity+++GO:0080044///quercetin 7-O-glucosyltransferase activity
AT2G04240	'AT2G04240.2'		mRNA	-0.520264	0.0190831	36.87	35.89	36.9	25.38	22.15	26.34	23.73	27.43	24.35	36.5533	25.17	24.6233		GO:0016740///transferase activity+++GO:0046872///metal ion binding
AT1G26800	'AT1G26800.1'		mRNA	-0.518771	0.0135387	19.62	20.89	20.73	13.27	12.13	14.83	14.1	14.77	13.35	20.4133	14.0733	13.41		GO:0046872///metal ion binding+++GO:0051787///misfolded protein binding+++GO:0061630///ubiquitin protein ligase activity
AT1G07090	'AT1G07090.1'		mRNA	-0.511322	0.0140218	29.93	33.46	28.62	18.19	17.88	16.65	23.62	20.98	19.04	30.67	21.2133	17.5733	04016///MAPK signaling pathway - plant+++04075///Plant hormone signal transduction+++04626///Plant-pathogen interaction	GO:0003677///DNA binding
AT3G56210	'AT3G56210.5'		mRNA	-0.507766	0.0267081	25.56	33.56	31.45	19.45	20.59	19.81	19.9	21.18	21.27	30.19	20.7833	19.95
AT1G26770	'AT1G26770.2'		mRNA	-0.507299	0.0167781	33.59	36.39	30.34	20.98	22.89	18.13	22.66	25.65	19.57	33.44	22.6267	20.6667		GO:0005199///structural constituent of cell wall
AT4G38620	'AT4G38620.1'		mRNA	-0.507031	0.0408861	19.19	23.33	16.73	8.82	10.09	8.4	14.81	13.37	12.82	19.75	13.6667	9.10333		GO:0000976///transcription regulatory region sequence-specific DNA binding+++GO:0003677///DNA binding+++GO:0003700///DNA-binding transcription factor activity
AT2G20570	'AT2G20570.2'		mRNA	-0.498364	6.95156e-06	83.63	91.8	84.12	46.38	49.53	47.39	59.63	62.29	59.34	86.5167	60.42	47.7667	04075///Plant hormone signal transduction	GO:0000976///transcription regulatory region sequence-specific DNA binding+++GO:0003700///DNA-binding transcription factor activity
AT4G27900	'AT4G27900.2'		mRNA	-0.49508	0.0249493	39.36	51.13	50.6	25.07	21.01	23.38	34.31	31.76	32.46	47.03	32.8433	23.1533
AT5G11060	'AT5G11060.1'		mRNA	-0.48753	0.00165269	26.05	26.66	23.88	18.84	18.47	17.8	17.59	18.76	17.56	25.53	17.97	18.37		GO:0000978///RNA polymerase II proximal promoter sequence-specific DNA binding+++GO:0000981///DNA-binding transcription factor activity, RNA polymerase II-specific+++GO:0003700///DNA-binding transcription factor activity
AT1G13930	'AT1G13930.3'		mRNA	-0.486163	0.00157795	862.71	1145.02	1009.84	695.16	663.11	689.53	702.69	693.87	715.08	1005.86	703.88	682.6		GO:0003729///mRNA binding
AT5G44190	'AT5G44190.1'		mRNA	-0.474281	0.0118416	156.17	157.24	174.78	127.75	108.22	101.5	114.14	131.39	103.01	162.73	116.18	112.49	04075///Plant hormone signal transduction	GO:0000976///transcription regulatory region sequence-specific DNA binding+++GO:0003700///DNA-binding transcription factor activity
AT1G06040	'AT1G06040.2'		mRNA	-0.473872	0.00617336	209.31	201.31	211.34	139.66	139.01	141.26	140.64	168.55	134.44	207.32	147.877	139.977	00500///Starch and sucrose metabolism	GO:0003677///DNA binding+++GO:0003700///DNA-binding transcription factor activity+++GO:0003712///transcription coregulator activity+++GO:0008270///zinc ion binding
AT1G56010	'AT1G56010.2'		mRNA	-0.472716	0.04999	32.6	35.56	24.58	17.43	17.76	13.7	22.02	22.96	20.76	30.9133	21.9133	16.2967		GO:0003677///DNA binding+++GO:0003700///DNA-binding transcription factor activity
AT1G79160	'AT1G79160.1'		mRNA	-0.464286	0.0151963	42.37	42.21	36.65	28.22	27.26	27.6	30.05	28.32	28.2	40.41	28.8567	27.6933
AT5G60850	'AT5G60850.1'		mRNA	-0.462907	0.0392545	34.16	32.31	37.96	35.13	33.9	37.32	25.52	25.82	23.77	34.81	25.0367	35.45
AT4G28240	'AT4G28240.1'		mRNA	-0.461309	0.00611315	104.69	111.29	99.35	78.65	74.48	85.95	68.38	84.03	73.23	105.11	75.2133	79.6933
AT1G64640	'AT1G64640.1'		mRNA	-0.456263	0.0180859	45.07	54.26	47.99	37.2	34.28	33.48	35.47	37.59	32.65	49.1067	35.2367	34.9867		GO:0009055///electron transfer activity
AT2G22430	'AT2G22430.1'		mRNA	-0.450271	2.86681e-05	172.98	203.76	170.14	149.71	129.98	143.7	133.01	134.76	126.5	182.293	131.423	141.13		GO:0000976///transcription regulatory region sequence-specific DNA binding+++GO:0000981///DNA-binding transcription factor activity, RNA polymerase II-specific+++GO:0003677///DNA binding+++GO:0003700///DNA-binding transcription factor activity+++GO:0043565///sequence-specific DNA binding
AT2G40900	'AT2G40900.1'		mRNA	-0.444139	0.0446064	16	19.06	14.97	9.35	11.16	7.67	12.73	12.15	11.35	16.6767	12.0767	9.39333		GO:0015186///L-glutamine transmembrane transporter activity
AT4G27820	'AT4G27820.1'		mRNA	-0.44028	0.0231388	22.85	23.31	21.86	16.16	15.47	13.17	15.67	17.91	15.92	22.6733	16.5	14.9333	00460///Cyanoamino acid metabolism+++00500///Starch and sucrose metabolism+++00999///Biosynthesis of various plant secondary metabolites	GO:0008422///beta-glucosidase activity+++GO:0102483///scopolin beta-glucosidase activity
AT4G32940	'AT4G32940.1'		mRNA	-0.436646	0.000619976	242.27	300.32	245.77	142.05	149.01	138.7	204.38	196.76	173.35	262.787	191.497	143.253		GO:0004175///endopeptidase activity+++GO:0004197///cysteine-type endopeptidase activity
AT4G26540	'AT4G26540.1'		mRNA	-0.434306	0.0267081	11.68	12.93	12.17	13.31	11.76	8.39	8.95	10.13	7.87	12.26	8.98333	11.1533		GO:0001653///peptide receptor activity+++GO:0005524///ATP binding+++GO:0042277///peptide binding
AT1G64390	'AT1G64390.1'		mRNA	-0.430428	0.0439303	38.21	41.6	33.25	24.08	19.93	16.29	32.8	26.06	24.06	37.6867	27.64	20.1	00500///Starch and sucrose metabolism	GO:0008810///cellulase activity+++GO:0030246///carbohydrate binding
AT3G15840	'AT3G15840.5'		mRNA	-0.423708	0.00820671	250.57	259.15	231.15	194.79	213.44	214.97	170.16	181.16	191.95	246.957	181.09	207.733
AT3G11660	'AT3G11660.1'		mRNA	-0.410928	0.00323148	88.14	90.05	79.42	38.15	48.37	32.33	64.54	63.53	62.87	85.87	63.6467	39.6167
AT3G50740	'AT3G50740.1'		mRNA	-0.388189	0.00784028	97.91	110.75	92.41	67.73	75.79	69	82.43	78.78	66.04	100.357	75.75	70.84	00940///Phenylpropanoid biosynthesis	GO:0047209///coniferyl-alcohol glucosyltransferase activity+++GO:0102952///UDP-glucose:coniferaldehyde 4-beta-D-glucosyltransferase activity+++GO:0102956///UDP-glucose:sinapaldehyde 4-beta-D-glucosyltransferase activity
AT2G35940	'AT2G35940.3'		mRNA	-0.378907	0.0367904	49.16	58.52	47.52	30.25	34.14	28.19	36.18	42.11	39.61	51.7333	39.3	30.86		GO:0000978///RNA polymerase II proximal promoter sequence-specific DNA binding+++GO:0000981///DNA-binding transcription factor activity, RNA polymerase II-specific+++GO:0003677///DNA binding+++GO:0003700///DNA-binding transcription factor activity+++GO:0042803///protein homodimerization activity+++GO:0046982///protein heterodimerization activity
AT5G24120	'AT5G24120.1'		mRNA	-0.37022	0.0203675	39.47	44.07	38.3	24.07	30.77	24.9	30.07	31.42	31.38	40.6133	30.9567	26.58
AT5G12250	'AT5G12250.1'		mRNA	-0.368529	0.0172188	129.5	151.35	144.44	125.31	114.39	117.87	108.27	117.56	99.74	141.763	108.523	119.19	04145///Phagosome	GO:0003924///GTPase activity+++GO:0005200///structural constituent of cytoskeleton+++GO:0005525///GTP binding
AT5G20790	'AT5G20790.2'		mRNA	-0.36025	0.0328522	247.68	312.71	266.01	58.2	80.75	65.94	213.29	207.72	213.81	275.467	211.607	68.2967
AT1G07350	'AT1G07350.2'		mRNA	-0.3599	0.0443906	43.78	46.54	38.81	23.03	26.04	18.24	32.41	35.21	31.57	43.0433	33.0633	22.4367	03040///Spliceosome	GO:0003676///nucleic acid binding
AT2G15970	'AT2G15970.2'		mRNA	-0.357518	0.022975	142.24	167.59	154.08	117.91	144.65	154.36	126.49	114.47	115.72	154.637	118.893	138.973	04144///Endocytosis
AT4G16190	'AT4G16190.1'		mRNA	-0.317776	0.0277593	413.93	427.83	379.4	322.53	353.39	310.36	315.41	321.67	328.01	407.053	321.697	328.76	04626///Plant-pathogen interaction	GO:0004197///cysteine-type endopeptidase activity
AT5G20700	'AT5G20700.1'		mRNA	-0.297664	0.0376943	437.28	503.08	398.8	271.62	239.77	230.04	374.04	358	340.18	446.387	357.407	247.143		GO:0046872///metal ion binding

## Sheet: Up-regulated genes in OE line
Gene ID	Gene Symbol	Type	log2 (OE / Col)	Qvalue (OE / Col)	Col_1 TPM	Col_2 TPM	Col_3 TPM	M4_1 TPM	M4_2 TPM	M4_3 TPM	OE10_1 TPM	OE10_2 TPM	OE10_3 TPM	Col Average TPM	OE Average TPM	Mutant Average TPM	KEGG Pathway Desc	GO_F Desc
AT5G50520	'AT5G50520.1'	mRNA	9.34348	5.0489e-11	0	0	0	3.23	3.2	0	6.46	3.25	3.11	0	4.27333	2.14333
AT1G02816	'AT1G02816.1'	mRNA	5.56115	9.02334e-135	30.16	24.24	47.51	11.39	10.18	12.6	1739.52	1569.17	1500.63	33.97	1603.11	11.39
AT3G01345	'AT3G01345.1'	mRNA	4.46332	0.0422217	0.12	0.28	0.12	0.36	0.36	0.43	1.09	0.45	9.17	0.173333	3.57	0.383333
AT2G41850	'AT2G41850.1'	mRNA	4.42207	0.0130001	0.19	0.51	0.54	0.19	0.23	0	5.81	0.9	18.5	0.413333	8.40333	0.14	00040///Pentose and glucuronate interconversions	GO:0004650///polygalacturonase activity
AT3G42658	'AT3G42658.1'	mRNA	3.90936	8.41457e-22	0.91	1.38	1.18	15.87	8.93	9.19	25.82	13.82	12.01	1.15667	17.2167	11.33
AT2G19500	'AT2G19500.1'	mRNA	3.84269	0.0380395	0.04	0.04	0.04	0	0.04	0	0.62	0.2	0.79	0.04	0.536667	0.0133333	00908///Zeatin biosynthesis	GO:0008131///primary amine oxidase activity+++GO:0016491///oxidoreductase activity+++GO:0019139///cytokinin dehydrogenase activity+++GO:0071949///FAD binding
AT5G28237	'AT5G28237.1'	mRNA	3.51482	0.0474855	0.08	0.12	0.12	0.12	0.17	0.28	0.54	0.08	2.94	0.106667	1.18667	0.19	00260///Glycine, serine and threonine metabolism+++00400///Phenylalanine, tyrosine and tryptophan biosynthesis+++01230///Biosynthesis of amino acids	GO:0004834///tryptophan synthase activity
AT2G39030	'AT2G39030.1'	mRNA	3.50017	0.0327896	2.88	2.67	2.47	4.7	16.61	5	11.43	6.75	68.21	2.67333	28.7967	8.77		GO:0008080///N-acetyltransferase activity
AT3G60170	'AT3G60170.1'	mRNA	3.33196	0.000830057	0.01	0.04	0.07	0.22	0.38	0.26	0.26	0.68	0.35	0.04	0.43	0.286667	03020///RNA polymerase	GO:0003676///nucleic acid binding+++GO:0008270///zinc ion binding
AT1G30135	'AT1G30135.1'	mRNA	2.67216	0.0240817	0.85	0.72	1.22	0.87	1.92	3.74	7.07	1.25	9.03	0.93	5.78333	2.17667
AT2G34600	'AT2G34600.1'	mRNA	2.61867	4.48086e-06	1.38	1.57	0.77	3.86	16.71	11.88	5.06	7.84	9.27	1.24	7.39	10.8167
AT1G35140	'AT1G35140.1'	mRNA	2.36239	1.75617e-12	8.94	5.46	14.4	116.6	170.91	213.47	49.88	44.2	53.96	9.6	49.3467	166.993	00280///Valine, leucine and isoleucine degradation
AT1G33760	'AT1G33760.1'	mRNA	2.07181	0.0273208	1.02	0.36	2.08	2.92	6.06	7.37	4.71	3.32	6.47	1.15333	4.83333	5.45		GO:0003677///DNA binding+++GO:0003700///DNA-binding transcription factor activity
AT4G34410	'AT4G34410.1'	mRNA	2.04343	0.00709012	0.52	0.29	0.29	0.29	1.7	1.33	1.47	1.78	1.29	0.366667	1.51333	1.10667		GO:0000976///transcription regulatory region sequence-specific DNA binding+++GO:0003700///DNA-binding transcription factor activity
AT1G05610	'AT1G05610.1'	mRNA	2.01732	0.0329288	0.71	0.73	1.07	0.91	0.5	0.26	3.68	0.82	5.41	0.836667	3.30333	0.556667	00500///Starch and sucrose metabolism+++00520///Amino sugar and nucleotide sugar metabolism+++01250///Biosynthesis of nucleotide sugars	GO:0005524///ATP binding+++GO:0008878///glucose-1-phosphate adenylyltransferase activity
AT5G45340	'AT5G45340.2'	mRNA	1.99772	6.94781e-08	2.19	2.6	5.09	6.2	6.2	9	13	10.82	15.49	3.29333	13.1033	7.13333	00906///Carotenoid biosynthesis	GO:0004497///monooxygenase activity+++GO:0005506///iron ion binding+++GO:0010295///(+)-abscisic acid 8'-hydroxylase activity+++GO:0016491///oxidoreductase activity+++GO:0016709///oxidoreductase activity, acting on paired donors, with incorporation or reduction of molecular oxygen, NAD(P)H as one donor, and incorporation of one atom of oxygen+++GO:0020037///heme binding
AT4G08950	'AT4G08950.1'	mRNA	1.94276	0.000297363	69.76	50.63	111.2	386.24	450.34	480.17	283.77	264.43	339.51	77.1967	295.903	438.917	00280///Valine, leucine and isoleucine degradation
AT1G02310	'AT1G02310.1'	mRNA	1.8753	0.0464133	1.22	0.97	1.76	0.44	0.48	0.47	5.23	1.17	7.82	1.31667	4.74	0.463333	00051///Fructose and mannose metabolism	GO:0016985///mannan endo-1,4-beta-mannosidase activity
AT5G57560	'AT5G57560.1'	mRNA	1.77883	0.00604556	79.24	42.57	113.02	400.08	568.97	793.48	244.76	249.95	310.64	78.2767	268.45	587.51		GO:0004553///hydrolase activity, hydrolyzing O-glycosyl compounds+++GO:0016762///xyloglucan:xyloglucosyl transferase activity
AT2G25460	'AT2G25460.1'	mRNA	1.75651	0.0212314	1.07	0.71	1.4	1.49	2.19	2.44	3.49	1.43	5.64	1.06	3.52	2.04
AT5G13220	'AT5G13220.4'	mRNA	1.70124	0.00268284	5.97	3.61	3.36	6.31	15.7	10.02	11.97	7	21.95	4.31333	13.64	10.6767	04075///Plant hormone signal transduction	GO:0042803///protein homodimerization activity
AT3G44860	'AT3G44860.1'	mRNA	1.70033	5.2997e-05	3.32	2.13	4.74	8.73	14.98	12.32	11.96	7.98	13.03	3.39667	10.99	12.01		GO:0008757///S-adenosylmethionine-dependent methyltransferase activity+++GO:0019010///farnesoic acid O-methyltransferase activity+++GO:0046872///metal ion binding
AT3G19680	'AT3G19680.1'	mRNA	1.6383	1.11191e-10	19.65	18.41	31.63	109.55	106.46	111.98	64.68	72.79	78.26	23.23	71.91	109.33
AT1G05675	'AT1G05675.1'	mRNA	1.4716	5.97611e-05	1.51	1.24	1.57	4.74	5.6	5.8	4.58	3.9	3.44	1.44	3.97333	5.38		GO:0080043///quercetin 3-O-glucosyltransferase activity+++GO:0080044///quercetin 7-O-glucosyltransferase activity
AT1G21910	'AT1G21910.1'	mRNA	1.44376	5.2997e-05	16.72	12.89	30.45	65.94	70.58	77.14	56.41	52.03	55.11	20.02	54.5167	71.22		GO:0000976///transcription regulatory region sequence-specific DNA binding+++GO:0003700///DNA-binding transcription factor activity
AT5G64190	'AT5G64190.1'	mRNA	1.41647	0.00703177	1.33	2.89	2.81	3.9	4.08	3.7	4.39	5.36	8.53	2.34333	6.09333	3.89333
AT1G17380	'AT1G17380.1'	mRNA	1.4066	0.00783052	2.79	4.7	3.63	4.74	11.86	6.9	9.89	5.23	13.49	3.70667	9.53667	7.83333	04075///Plant hormone signal transduction
AT5G63160	'AT5G63160.1'	mRNA	1.39978	6.36837e-15	52.07	56.47	67.15	296.87	364.06	276.86	138.5	184.46	136.97	58.5633	153.31	312.597		GO:0005516///calmodulin binding+++GO:0046872///metal ion binding
AT3G48360	'AT3G48360.1'	mRNA	1.36757	5.14618e-07	103.74	85.43	153.71	373.56	445.84	322.1	248.54	339.29	294.4	114.293	294.077	380.5		GO:0005516///calmodulin binding+++GO:0046872///metal ion binding
AT1G56240	'AT1G56240.1'	mRNA	1.35732	0.0276331	1.44	0.87	1.7	5.81	5.41	4.43	4.21	2.93	3.11	1.33667	3.41667	5.21667		GO:0030246///carbohydrate binding
AT1G50040	'AT1G50040.1'	mRNA	1.33833	9.76387e-05	1.97	1.58	1.31	15.4	16.95	17.03	4.21	4	3.91	1.62	4.04	16.46
AT2G39650	'AT2G39650.1'	mRNA	1.33485	0.00188108	5.92	3.54	7.41	7.69	8.21	8.96	14.84	10.34	17.11	5.62333	14.0967	8.28667
AT3G23240	'AT3G23240.1'	mRNA	1.33142	0.00379384	5.8	5.23	9.63	2.17	4.78	5.86	16.02	12.54	22.77	6.88667	17.11	4.27	04016///MAPK signaling pathway - plant+++04075///Plant hormone signal transduction	GO:0000976///transcription regulatory region sequence-specific DNA binding+++GO:0003677///DNA binding+++GO:0003700///DNA-binding transcription factor activity
AT4G33720	'AT4G33720.1'	mRNA	1.32367	1.4108e-05	50.12	77.57	52.8	11.89	58.06	10.24	215.44	102.39	125.57	60.1633	147.8	26.73	04016///MAPK signaling pathway - plant+++04075///Plant hormone signal transduction+++04626///Plant-pathogen interaction
AT4G26200	'AT4G26200.1'	mRNA	1.32105	0.0170245	3.86	2.15	5.68	5.28	5.29	8.32	9.71	6.83	12.51	3.89667	9.68333	6.29667	00270///Cysteine and methionine metabolism	GO:0016847///1-aminocyclopropane-1-carboxylate synthase activity+++GO:0030170///pyridoxal phosphate binding+++GO:0042802///identical protein binding
AT5G35490	'AT5G35490.1'	mRNA	1.3191	0.0226225	7.66	5.32	13.79	10.04	8.88	16.51	21.26	16.2	28.83	8.92333	22.0967	11.81	00010///Glycolysis / Gluconeogenesis+++00053///Ascorbate and aldarate metabolism+++00071///Fatty acid degradation+++00260///Glycine, serine and threonine metabolism+++00280///Valine, leucine and isoleucine degradation+++00310///Lysine degradation+++00330///Arginine and proline metabolism+++00340///Histidine metabolism+++00380///Tryptophan metabolism+++00410///beta-Alanine metabolism+++00561///Gly…	GO:0016788///hydrolase activity, acting on ester bonds
AT1G16130	'AT1G16130.1'	mRNA	1.27164	2.08373e-06	2.42	1.86	2.25	6.2	8.36	8.81	5.67	4.39	5.56	2.17667	5.20667	7.79	04626///Plant-pathogen interaction	GO:0004674///protein serine/threonine kinase activity+++GO:0005509///calcium ion binding+++GO:0005524///ATP binding+++GO:0030247///polysaccharide binding
AT2G24600	'AT2G24600.4'	mRNA	1.25684	1.27685e-09	10.02	10.26	10.07	24.48	30.5	38.89	24.94	18.59	27.24	10.1167	23.59	31.29
AT2G17230	'AT2G17230.1'	mRNA	1.24724	2.29254e-12	17.44	19.31	21.26	97.29	86.53	84.48	41.85	43.22	50.62	19.3367	45.23	89.4333
AT1G72940	'AT1G72940.1'	mRNA	1.22116	6.27664e-05	22.22	15.31	29.58	29.7	42.12	40.3	55.69	44.87	55.49	22.37	52.0167	37.3733	00500///Starch and sucrose metabolism	GO:0016787///hydrolase activity+++GO:0043531///ADP binding
AT2G27690	'AT2G27690.1'	mRNA	1.21004	0.0249493	2.07	0.9	2.15	6.61	10.2	10.55	3.56	4.29	3.99	1.70667	3.94667	9.12		GO:0005506///iron ion binding+++GO:0018685///alkane 1-monooxygenase activity+++GO:0020037///heme binding
AT5G39580	'AT5G39580.2'	mRNA	1.19581	0.000502188	10.82	7.19	6.13	28.8	21.18	23.71	23.97	17.14	13.9	8.04667	18.3367	24.5633	00940///Phenylpropanoid biosynthesis	GO:0004601///peroxidase activity+++GO:0020037///heme binding+++GO:0046872///metal ion binding
AT1G66090	'AT1G66090.1'	mRNA	1.16774	0.00595915	5.43	3.51	4.82	6.34	10.71	9.86	9.35	7.42	13.67	4.58667	10.1467	8.97		GO:0016787///hydrolase activity+++GO:0043531///ADP binding
AT2G43620	'AT2G43620.1'	mRNA	1.15964	0.00147895	8.18	9.3	10.22	34.96	9.76	13.39	13.29	27.07	20.66	9.23333	20.34	19.37	00520///Amino sugar and nucleotide sugar metabolism	GO:0004568///chitinase activity+++GO:0008061///chitin binding
AT3G10040	'AT3G10040.1'	mRNA	1.15398	0.00425036	7.67	15	15.13	44.59	28.5	40.81	25.74	38.76	18.97	12.6	27.8233	37.9667		GO:0000976///transcription regulatory region sequence-specific DNA binding+++GO:0003700///DNA-binding transcription factor activity
AT5G35480	'AT5G35480.1'	mRNA	1.14155	0.0167295	58.07	44.82	91.1	45.29	44.06	84.87	170.3	98.26	154.61	64.6633	141.057	58.0733
AT4G21680	'AT4G21680.1'	mRNA	1.12413	0.0446064	4.22	6.79	4.48	2.79	7.43	5.86	8.96	6.43	17.2	5.16333	10.8633	5.36		GO:0015112///nitrate transmembrane transporter activity+++GO:0015293///symporter activity
AT1G28370	'AT1G28370.1'	mRNA	1.12408	0.0410741	13.06	10.14	21.07	10.91	16.86	30.03	37.99	18.75	39.14	14.7567	31.96	19.2667		GO:0003677///DNA binding+++GO:0003700///DNA-binding transcription factor activity
AT5G35777	'AT5G35777.1'	mRNA	1.11019	0.034032	0.67	0.82	1.6	2.42	3.58	2.56	2.01	2.37	2.28	1.03	2.22	2.85333		GO:0003676///nucleic acid binding
AT5G57220	'AT5G57220.1'	mRNA	1.10831	3.53567e-07	9.47	12.23	14.45	29.75	26.3	28.65	29.46	24.74	23.13	12.05	25.7767	28.2333		GO:0005506///iron ion binding+++GO:0016709///oxidoreductase activity, acting on paired donors, with incorporation or reduction of molecular oxygen, NAD(P)H as one donor, and incorporation of one atom of oxygen+++GO:0020037///heme binding
AT2G26560	'AT2G26560.1'	mRNA	1.09527	0.000114263	57.72	68.38	97.55	98.39	105.53	104.37	191.58	124.37	158.79	74.55	158.247	102.763		GO:0004620///phospholipase activity+++GO:0016298///lipase activity+++GO:0042802///identical protein binding+++GO:0047372///acylglycerol lipase activity
AT4G23810	'AT4G23810.1'	mRNA	1.08992	5.32887e-05	14.2	9.06	8.45	14.41	12.48	20.18	21.02	23.6	22.11	10.57	22.2433	15.69	04626///Plant-pathogen interaction	GO:0000976///transcription regulatory region sequence-specific DNA binding+++GO:0003677///DNA binding+++GO:0003700///DNA-binding transcription factor activity
AT1G70700	'AT1G70700.2'	mRNA	1.08846	0.000467383	53.67	74.81	73.98	80.87	165	128.03	108.41	119.67	191.63	67.4867	139.903	124.633	04075///Plant hormone signal transduction
AT2G41100	'AT2G41100.4'	mRNA	1.08328	8.09648e-05	400.62	268.78	475.18	826.26	956.59	1237.96	853.25	704.07	845.67	381.527	800.997	1006.94	04626///Plant-pathogen interaction	GO:0003729///mRNA binding+++GO:0005509///calcium ion binding
AT4G32800	'AT4G32800.1'	mRNA	1.08147	0.0146307	3.18	4.02	2.62	7.98	9.83	15.76	5.79	5.48	8.95	3.27333	6.74	11.19		GO:0000976///transcription regulatory region sequence-specific DNA binding+++GO:0003700///DNA-binding transcription factor activity
AT1G02610	'AT1G02610.1'	mRNA	1.07062	0.000171218	15.21	11.63	19.62	31.09	43.66	46.57	33.41	34.71	29.16	15.4867	32.4267	40.44		GO:0004842///ubiquitin-protein transferase activity+++GO:0008270///zinc ion binding
AT3G02550	'AT3G02550.1'	mRNA	1.07053	5.2997e-05	43.65	73.19	75.42	140.26	107.61	128.39	110.66	152.14	134.78	64.0867	132.527	125.42
AT3G54810	'AT3G54810.2'	mRNA	1.07013	7.96706e-08	26.66	24.42	31.43	56.82	64.25	70.52	57.46	50.8	63.22	27.5033	57.16	63.8633	00280///Valine, leucine and isoleucine degradation	GO:0000976///transcription regulatory region sequence-specific DNA binding+++GO:0003700///DNA-binding transcription factor activity+++GO:0008270///zinc ion binding
AT2G19800	'AT2G19800.1'	mRNA	1.05325	1.23341e-06	44.45	48.34	60.67	230.01	255.69	338.79	109.7	88.09	116.86	51.1533	104.883	274.83	00053///Ascorbate and aldarate metabolism+++00562///Inositol phosphate metabolism+++01250///Biosynthesis of nucleotide sugars	GO:0005506///iron ion binding+++GO:0050113///inositol oxygenase activity
AT4G34150	'AT4G34150.1'	mRNA	1.05143	5.76312e-05	46	39.86	54.9	69.21	104.68	101.49	93.72	77.81	116.56	46.92	96.03	91.7933	00564///Glycerophospholipid metabolism+++00565///Ether lipid metabolism+++04144///Endocytosis
AT3G59080	'AT3G59080.2'	mRNA	1.03434	0.0109	7.18	4.85	10.78	16.43	21.12	20.84	14.72	15.5	16.47	7.60333	15.5633	19.4633		GO:0004190///aspartic-type endopeptidase activity
AT5G67300	'AT5G67300.1'	mRNA	1.0318	8.28968e-07	47.04	49.68	65.15	92.51	116.09	109.97	116.51	94.88	116.5	53.9567	109.297	106.19		GO:0000976///transcription regulatory region sequence-specific DNA binding+++GO:0000978///RNA polymerase II proximal promoter sequence-specific DNA binding+++GO:0000981///DNA-binding transcription factor activity, RNA polymerase II-specific+++GO:0003700///DNA-binding transcription factor activity+++GO:0042802///identical protein binding+++GO:0043565///sequence-specific DNA binding
AT1G15040	'AT1G15040.2'	mRNA	1.02462	1.42155e-09	23.48	23.55	25.14	28.41	30.46	12.61	48.22	43.31	53.55	24.0567	48.36	23.8267		GO:0016740///transferase activity+++GO:0016811///hydrolase activity, acting on carbon-nitrogen (but not peptide) bonds, in linear amides
AT5G03360	'AT5G03360.2'	mRNA	1.02113	1.05634e-06	5.43	4.38	4.36	11.16	14.98	13.66	10.14	10.38	8.06	4.72333	9.52667	13.2667
AT5G41080	'AT5G41080.2'	mRNA	1.01955	0.000831445	35.93	30.85	53.05	81.67	89.05	94.63	79.66	69.93	91.75	39.9433	80.4467	88.45	00564///Glycerophospholipid metabolism	GO:0008889///glycerophosphodiester phosphodiesterase activity
AT4G39070	'AT4G39070.1'	mRNA	1.00527	0.0138807	3.81	3.58	5.41	9.48	8.65	10.23	9.8	7.57	8.15	4.26667	8.50667	9.45333	00500///Starch and sucrose metabolism	GO:0000976///transcription regulatory region sequence-specific DNA binding+++GO:0003700///DNA-binding transcription factor activity+++GO:0008270///zinc ion binding
AT4G13340	'AT4G13340.1'	mRNA	0.99219	8.4881e-13	16.69	20.01	19.72	67.22	95.64	74.92	37.17	40.87	33.03	18.8067	37.0233	79.26	04144///Endocytosis	GO:0005199///structural constituent of cell wall
AT2G26190	'AT2G26190.1'	mRNA	0.978908	1.77588e-06	33.08	25.47	31.47	40.55	51.72	51.03	58.58	51.9	65.11	30.0067	58.53	47.7667		GO:0005516///calmodulin binding
AT1G61820	'AT1G61820.3'	mRNA	0.977596	0.0172188	6.75	6.59	5.16	7.85	10.77	4.72	18.06	8.32	9.92	6.16667	12.1	7.78	00460///Cyanoamino acid metabolism+++00500///Starch and sucrose metabolism+++00999///Biosynthesis of various plant secondary metabolites	GO:0008422///beta-glucosidase activity+++GO:0047782///coniferin beta-glucosidase activity+++GO:0102483///scopolin beta-glucosidase activity
AT1G69880	'AT1G69880.1'	mRNA	0.97697	3.20155e-05	12.41	18.21	13.36	4.21	9.01	2.69	28.98	30.76	25.15	14.66	28.2967	5.30333
AT2G47440	'AT2G47440.1'	mRNA	0.976209	5.23034e-07	18.25	16.64	22.43	56.37	54.78	46.94	36.49	37.13	38.26	19.1067	37.2933	52.6967
AT2G28120	'AT2G28120.1'	mRNA	0.949748	1.06434e-06	11.95	9.13	11.08	15.39	25.35	21.85	20.76	22.51	18.49	10.72	20.5867	20.8633
AT1G53903	'AT1G53903.1'	mRNA	0.934512	0.0193809	15.43	16.92	19.35	14.85	30.84	29.44	28.1	25.93	42.53	17.2333	32.1867	25.0433		GO:0046872///metal ion binding
AT5G41750	'AT5G41750.2'	mRNA	0.928282	0.000502188	6.58	4.82	3.85	6.26	10.46	9.26	8.67	10.54	9.79	5.08333	9.66667	8.66		GO:0016787///hydrolase activity+++GO:0043531///ADP binding
AT5G25240	'AT5G25240.1'	mRNA	0.927771	0.0218293	8.25	11.8	11.63	42.42	44.67	47.64	22.17	22.63	14.66	10.56	19.82	44.91
AT3G48390	'AT3G48390.1'	mRNA	0.924504	0.00300207	2	1.86	2.12	5.85	8.87	5.87	3.37	4.17	3.7	1.99333	3.74667	6.86333		GO:0043022///ribosome binding
AT1G11050	'AT1G11050.1'	mRNA	0.916724	0.000171218	9.75	11.59	14.41	12.65	17.06	13.25	24.74	19.03	23.07	11.9167	22.28	14.32	04016///MAPK signaling pathway - plant+++04075///Plant hormone signal transduction+++04626///Plant-pathogen interaction	GO:0004674///protein serine/threonine kinase activity+++GO:0005524///ATP binding
AT5G49360	'AT5G49360.1'	mRNA	0.916279	7.04671e-11	145.18	136.28	128.6	483.29	531.73	480.98	245.49	300.11	221.33	136.687	255.643	498.667	00520///Amino sugar and nucleotide sugar metabolism	GO:0009044///xylan 1,4-beta-xylosidase activity+++GO:0046556///alpha-L-arabinofuranosidase activity
AT4G24380	'AT4G24380.2'	mRNA	0.915126	0.0434129	12.79	14.76	16.29	9.7	12.8	16.95	27.15	17.51	36.2	14.6133	26.9533	13.15
AT1G70290	'AT1G70290.1'	mRNA	0.893516	0.000502188	59.97	57.3	89.46	125.06	152.34	132.8	119.84	140.39	122.57	68.91	127.6	136.733	00500///Starch and sucrose metabolism	GO:0016757///transferase activity, transferring glycosyl groups
AT1G70090	'AT1G70090.2'	mRNA	0.893006	3.19702e-08	31.14	31.28	34.79	84.27	82.04	82.25	58.95	55.28	63.97	32.4033	59.4	82.8533		GO:0047262///polygalacturonate 4-alpha-galacturonosyltransferase activity
AT4G30280	'AT4G30280.1'	mRNA	0.890415	0.000524753	20.96	19.78	23	39.68	84.91	150.73	50.36	32.39	34.54	21.2467	39.0967	91.7733		GO:0004553///hydrolase activity, hydrolyzing O-glycosyl compounds+++GO:0016762///xyloglucan:xyloglucosyl transferase activity
AT5G56870	'AT5G56870.1'	mRNA	0.883422	0.000518909	87.08	61.99	57.83	208.97	250.2	185.84	103.83	150.64	123.05	68.9667	125.84	215.003	00052///Galactose metabolism+++00511///Other glycan degradation+++00531///Glycosaminoglycan degradation+++00600///Sphingolipid metabolism+++00604///Glycosphingolipid biosynthesis - ganglio series	GO:0004565///beta-galactosidase activity
AT1G13700	'AT1G13700.1'	mRNA	0.862669	5.4864e-05	12.49	12.26	10.32	33.34	34.12	38.74	19.94	23.93	19.06	11.69	20.9767	35.4	00030///Pentose phosphate pathway+++01200///Carbon metabolism	GO:0017057///6-phosphogluconolactonase activity
AT4G38470	'AT4G38470.1'	mRNA	0.851611	1.09091e-09	60.12	74.72	70.68	144.66	168.64	141.34	119.8	116.81	128.6	68.5067	121.737	151.547		GO:0004672///protein kinase activity+++GO:0004674///protein serine/threonine kinase activity+++GO:0004712///protein serine/threonine/tyrosine kinase activity+++GO:0005524///ATP binding
AT4G33050	'AT4G33050.4'	mRNA	0.844184	7.42496e-06	71.24	63.64	77.07	91.61	109.75	115.89	139.66	107.39	130.04	70.65	125.697	105.75		GO:0005516///calmodulin binding
AT5G47910	'AT5G47910.1'	mRNA	0.842771	0.000468112	35.91	48.19	51.85	47.09	61.93	47.28	75.34	70.82	93.84	45.3167	80	52.1	04016///MAPK signaling pathway - plant+++04626///Plant-pathogen interaction	GO:0004601///peroxidase activity+++GO:0005509///calcium ion binding+++GO:0016174///NAD(P)H oxidase activity
AT2G23290	'AT2G23290.1'	mRNA	0.840272	0.000199881	18.08	20.84	26.27	31.66	34.17	35.23	41.64	37.73	36.31	21.73	38.56	33.6867		GO:0000976///transcription regulatory region sequence-specific DNA binding+++GO:0000978///RNA polymerase II proximal promoter sequence-specific DNA binding+++GO:0000981///DNA-binding transcription factor activity, RNA polymerase II-specific+++GO:0003700///DNA-binding transcription factor activity
AT2G25735	'AT2G25735.1'	mRNA	0.827836	0.000468112	22.95	23.09	28.96	41.79	47.2	58.63	49.38	44.01	38.49	25	43.96	49.2067
AT3G45640	'AT3G45640.1'	mRNA	0.82126	5.36407e-05	107.88	112.38	140.2	119.13	167.14	180.73	215.6	186.47	227.89	120.153	209.987	155.667	04016///MAPK signaling pathway - plant+++04626///Plant-pathogen interaction	GO:0004707///MAP kinase activity+++GO:0005524///ATP binding
AT5G41740	'AT5G41740.2'	mRNA	0.815433	3.93721e-06	9.17	7.31	8.06	9.9	14.63	13.44	14.51	13.79	14.48	8.18	14.26	12.6567		GO:0043531///ADP binding
AT1G18570	'AT1G18570.1'	mRNA	0.812811	3.89261e-06	29.62	29.71	35.92	45.15	44.06	44.89	62.4	53.31	50.47	31.75	55.3933	44.7		GO:0000976///transcription regulatory region sequence-specific DNA binding+++GO:0003700///DNA-binding transcription factor activity
AT1G63750	'AT1G63750.3'	mRNA	0.808922	0.000166665	4.19	5.25	5.75	11.1	13.63	11.69	9.08	8.08	9.15	5.06333	8.77	12.14	00500///Starch and sucrose metabolism	GO:0005524///ATP binding+++GO:0043531///ADP binding+++GO:0050135///NAD(P)+ nucleosidase activity+++GO:0061809///NAD+ nucleotidase, cyclic ADP-ribose generating
AT1G72900	'AT1G72900.1'	mRNA	0.803512	0.00380077	61.22	44.59	59.47	51.89	80.6	65.41	107.44	75.72	102.92	55.0933	95.36	65.9667	00500///Starch and sucrose metabolism	GO:0016787///hydrolase activity+++GO:0043531///ADP binding
AT4G19160	'AT4G19160.3'	mRNA	0.802565	0.000106025	61.06	56.36	77.99	175.9	155.02	143.66	108.86	113.28	114.94	65.1367	112.36	158.193
AT3G57530	'AT3G57530.1'	mRNA	0.79931	0.00279313	23.58	25.1	30.74	38.5	52.67	51.06	46.87	36.33	53.25	26.4733	45.4833	47.41	04626///Plant-pathogen interaction	GO:0004683///calmodulin-dependent protein kinase activity+++GO:0005509///calcium ion binding+++GO:0005516///calmodulin binding+++GO:0005524///ATP binding+++GO:0009931///calcium-dependent protein serine/threonine kinase activity
AT5G45110	'AT5G45110.1'	mRNA	0.798581	1.21945e-05	22.62	17.24	19.66	26.48	35.47	30.89	33.79	34.38	34.44	19.84	34.2033	30.9467	04075///Plant hormone signal transduction	GO:0042802///identical protein binding+++GO:1901149///salicylic acid binding
AT1G15890	'AT1G15890.1'	mRNA	0.79734	0.00154805	2.51	2.52	2.87	3.72	3.98	3.88	4.73	4.27	4.58	2.63333	4.52667	3.86	04626///Plant-pathogen interaction	GO:0005524///ATP binding+++GO:0043531///ADP binding
AT1G19180	'AT1G19180.2'	mRNA	0.794687	0.027869	38.06	35.36	39.77	38.92	62.24	57.88	74.7	41.8	77.43	37.73	64.6433	53.0133	04075///Plant hormone signal transduction	GO:0042802///identical protein binding
AT4G25810	'AT4G25810.1'	mRNA	0.788787	0.0122225	21.03	15.79	16.66	30.89	57.52	78.54	39.18	24.93	27.58	17.8267	30.5633	55.65		GO:0004553///hydrolase activity, hydrolyzing O-glycosyl compounds+++GO:0016762///xyloglucan:xyloglucosyl transferase activity
AT3G62720	'AT3G62720.2'	mRNA	0.788052	0.000924412	16.06	14.23	19.29	37.47	49.4	52.49	27.14	27.29	31.08	16.5267	28.5033	46.4533		GO:0016758///transferase activity, transferring hexosyl groups+++GO:0033843///xyloglucan 6-xylosyltransferase activity+++GO:0035252///UDP-xylosyltransferase activity+++GO:0046872///metal ion binding
AT2G44500	'AT2G44500.2'	mRNA	0.78529	1.50602e-06	26.72	25.43	31.2	60.09	68.12	59.31	48.7	47.19	46.68	27.7833	47.5233	62.5067		GO:0016757///transferase activity, transferring glycosyl groups
AT1G03300	'AT1G03300.1'	mRNA	0.784788	0.00950442	2.92	2.75	2.76	6.69	6.18	5.79	5.38	4.39	4.6	2.81	4.79	6.22
AT2G34510	'AT2G34510.1'	mRNA	0.783208	0.00395559	20.63	17.72	26.65	64.24	64.81	70.05	36.08	35.86	39.13	21.6667	37.0233	66.3667
AT1G75020	'AT1G75020.2'	mRNA	0.775383	0.00135385	12.23	9.42	11.26	13.6	17.87	16.85	19.38	16.71	18.88	10.97	18.3233	16.1067	00561///Glycerolipid metabolism+++00564///Glycerophospholipid metabolism	GO:0003841///1-acylglycerol-3-phosphate O-acyltransferase activity+++GO:0016746///transferase activity, transferring acyl groups
AT1G08930	'AT1G08930.2'	mRNA	0.771089	5.24571e-07	130.77	122.02	140.69	232.76	272.62	320.7	237.71	203.22	224.5	131.16	221.81	275.36		GO:0022857///transmembrane transporter activity
AT4G36850	'AT4G36850.1'	mRNA	0.765778	0.0155097	30.65	41.96	53.49	160.66	187.11	179.52	62.03	81.76	68.59	42.0333	70.7933	175.763
AT5G54380	'AT5G54380.1'	mRNA	0.76524	1.02665e-10	17.51	17.77	18.22	45.97	54.06	48.47	30.13	31.02	28.82	17.8333	29.99	49.5	04626///Plant-pathogen interaction	GO:0004672///protein kinase activity+++GO:0004674///protein serine/threonine kinase activity+++GO:0005524///ATP binding
AT1G19380	'AT1G19380.1'	mRNA	0.764136	0.00845498	39.21	37.19	44.33	57.8	72.88	111.07	58.55	61.81	81.01	40.2433	67.1233	80.5833
AT4G36670	'AT4G36670.1'	mRNA	0.760865	0.0135101	45.98	30.62	49.28	77.4	98.58	105.32	63.63	78.01	70.85	41.96	70.83	93.7667		GO:0015293///symporter activity
AT1G69890	'AT1G69890.1'	mRNA	0.758779	0.0122482	25.63	20.68	31.92	45.56	58.89	57.23	38.85	46.71	45.89	26.0767	43.8167	53.8933
AT1G65490	'AT1G65490.1'	mRNA	0.749333	0.0256564	98.94	71.46	94.84	82.91	147.77	190.87	141.54	125.66	171.54	88.4133	146.247	140.517
AT1G72430	'AT1G72430.1'	mRNA	0.749173	4.48086e-06	56.02	61.39	68.29	129.52	141.39	150.34	106.33	100.05	101.45	61.9	102.61	140.417
AT5G26920	'AT5G26920.2'	mRNA	0.747544	0.0102631	14.47	10	11.3	15.06	20.46	19.15	22.85	16.5	20.21	11.9233	19.8533	18.2233
AT2G18700	'AT2G18700.1'	mRNA	0.742407	0.00646047	37	26.44	39.84	71.36	98.8	78.51	51.9	63.84	56.35	34.4267	57.3633	82.89	00500///Starch and sucrose metabolism
AT5G54710	'AT5G54710.1'	mRNA	0.739166	2.42571e-06	12.42	14.52	11.6	24.81	28.63	28.6	22.44	19.67	21.22	12.8467	21.11	27.3467
AT5G39890	'AT5G39890.1'	mRNA	0.735669	0.00435468	11.78	15.94	16.36	31.56	29.57	26.38	27.68	25.3	19.73	14.6933	24.2367	29.17		GO:0017172///cysteine dioxygenase activity+++GO:0046872///metal ion binding
AT3G20395	'AT3G20395.1'	mRNA	0.73261	0.017323	23.5	23.92	31.96	43.29	42.48	56.21	41.9	52.92	36.25	26.46	43.69	47.3267
AT1G10070	'AT1G10070.3'	mRNA	0.730395	0.0433063	16.15	13.71	19.7	56.69	48.97	52.91	21.4	28.32	31.54	16.52	27.0867	52.8567	00270///Cysteine and methionine metabolism+++00280///Valine, leucine and isoleucine degradation+++00290///Valine, leucine and isoleucine biosynthesis+++00770///Pantothenate and CoA biosynthesis+++00966///Glucosinolate biosynthesis+++01210///2-Oxocarboxylic acid metabolism+++01230///Biosynthesis of amino acids+++01240///Biosynthesis of cofactors	GO:0050048///L-leucine:2-oxoglutarate aminotransferase activity+++GO:0052654///L-leucine transaminase activity+++GO:0052655///L-valine transaminase activity+++GO:0052656///L-isoleucine transaminase activity
AT5G58120	'AT5G58120.1'	mRNA	0.728821	0.00048905	7.97	6.61	7.12	10.79	17.87	15.28	11.5	11.12	12.93	7.23333	11.85	14.6467		GO:0016787///hydrolase activity+++GO:0043531///ADP binding
AT3G45970	'AT3G45970.1'	mRNA	0.727854	0.03349	10.95	10.28	9.63	52.53	67.14	107.26	14.89	15.08	20.17	10.2867	16.7133	75.6433
AT3G30775	'AT3G30775.1'	mRNA	0.726952	0.0277593	96.1	88.87	133.69	342.68	411.18	375.55	187.82	138.34	197.08	106.22	174.413	376.47	00330///Arginine and proline metabolism	GO:0004657///proline dehydrogenase activity+++GO:0071949///FAD binding
AT5G66210	'AT5G66210.4'	mRNA	0.725797	0.000977733	19.98	21.9	22.06	34.22	41.84	42.38	34.04	29.38	40.63	21.3133	34.6833	39.48	04626///Plant-pathogen interaction	GO:0004674///protein serine/threonine kinase activity+++GO:0004683///calmodulin-dependent protein kinase activity+++GO:0004722///protein serine/threonine phosphatase activity+++GO:0005509///calcium ion binding+++GO:0005516///calmodulin binding+++GO:0005524///ATP binding+++GO:0009931///calcium-dependent protein serine/threonine kinase activity
AT2G23810	'AT2G23810.1'	mRNA	0.721529	0.00107781	101.06	79.36	103.84	105.25	165.42	179.28	157.62	141.73	165.17	94.7533	154.84	149.983
AT4G12720	'AT4G12720.4'	mRNA	0.720535	0.00489332	32.05	29.79	28.42	41.72	54.18	63.34	50.61	38.55	59.81	30.0867	49.6567	53.08		GO:0000210///NAD+ diphosphatase activity+++GO:0035529///NADH pyrophosphatase activity+++GO:0046872///metal ion binding+++GO:0047631///ADP-ribose diphosphatase activity+++GO:0051287///NAD binding
AT2G27500	'AT2G27500.3'	mRNA	0.718877	0.00113904	31.51	28.94	37.93	58.61	67.52	58.16	54.3	49.85	55.78	32.7933	53.31	61.43	00500///Starch and sucrose metabolism	GO:0042973///glucan endo-1,3-beta-D-glucosidase activity
AT3G28930	'AT3G28930.1'	mRNA	0.718433	0.00846145	66.96	85.28	67.46	54.01	52.95	70.01	103.33	102.13	146.65	73.2333	117.37	58.99		GO:0016746///transferase activity, transferring acyl groups
AT5G14120	'AT5G14120.1'	mRNA	0.712345	3.19702e-08	117.99	132.28	133.47	278.48	326.21	287.18	194.13	220.79	206.18	127.913	207.033	297.29
AT3G49530	'AT3G49530.1'	mRNA	0.709361	0.00192931	21.82	25.91	27.04	28.13	36.11	39.06	41.33	33.77	45.31	24.9233	40.1367	34.4333		GO:0000976///transcription regulatory region sequence-specific DNA binding+++GO:0003700///DNA-binding transcription factor activity+++GO:0043621///protein self-association
AT1G27770	'AT1G27770.2'	mRNA	0.699885	7.35317e-05	26.24	27.93	25.22	34.7	50.77	41.36	40.25	38.09	48.47	26.4633	42.27	42.2767		GO:0005388///calcium-transporting ATPase activity+++GO:0005516///calmodulin binding+++GO:0005524///ATP binding
AT1G20510	'AT1G20510.2'	mRNA	0.695916	0.0268671	22.46	26.15	22.73	16.25	33.54	28.52	37.24	28.3	47.59	23.78	37.71	26.1033	00592///alpha-Linolenic acid metabolism	GO:0005524///ATP binding+++GO:0016405///CoA-ligase activity+++GO:0102391///decanoate-CoA ligase activity
AT4G23180	'AT4G23180.1'	mRNA	0.692972	0.000845872	28.05	24.99	28.17	35.05	52.8	48.09	40.87	39.73	49	27.07	43.2	45.3133
AT1G18020	'AT1G18020.1'	mRNA	0.690379	0.00649599	78.38	55.43	79.49	116.2	131.69	154.98	115.95	114.59	111.8	71.1	114.113	134.29	00592///alpha-Linolenic acid metabolism	GO:0010181///FMN binding+++GO:0016491///oxidoreductase activity
AT1G23870	'AT1G23870.1'	mRNA	0.686071	5.2585e-07	31.79	33.37	36.35	64.27	76.99	62.18	53.56	58	50.32	33.8367	53.96	67.8133	00500///Starch and sucrose metabolism	GO:0003824///catalytic activity
AT5G22690	'AT5G22690.1'	mRNA	0.680597	0.00287837	4.59	5.49	4.81	9.35	12.34	12.02	7.43	7.16	8.88	4.96333	7.82333	11.2367	04626///Plant-pathogen interaction	GO:0016787///hydrolase activity+++GO:0043531///ADP binding
AT2G29300	'AT2G29300.2'	mRNA	0.6776	0.0474717	6.56	8.47	8.97	17.22	18.88	16.91	12.41	13.65	11.85	8	12.6367	17.67	00960///Tropane, piperidine and pyridine alkaloid biosynthesis	GO:0016491///oxidoreductase activity
AT5G05140	'AT5G05140.1'	mRNA	0.675054	0.00149608	20.46	20.79	22.28	31.18	35.19	31.75	32.27	29.55	38.15	21.1767	33.3233	32.7067		GO:0003746///translation elongation factor activity
AT5G23130	'AT5G23130.1'	mRNA	0.672446	0.0150768	5.15	4.47	5.19	9.8	11.06	11	8.15	7.73	7.52	4.93667	7.8	10.62
AT1G67470	'AT1G67470.1'	mRNA	0.666303	0.0219174	8.48	7.52	7.76	10.44	14.98	15.77	12.78	10.79	13.62	7.92	12.3967	13.73		GO:0004674///protein serine/threonine kinase activity+++GO:0005524///ATP binding
AT5G41100	'AT5G41100.2'	mRNA	0.661847	0.000652715	6.65	7.36	6.84	12.02	14.01	12.3	11.18	10.05	11.19	6.95	10.8067	12.7767
AT5G11250	'AT5G11250.1'	mRNA	0.661789	0.000103761	5.61	5.9	5.18	8.52	9.8	9.06	8.31	8.63	9.1	5.56333	8.68	9.12667		GO:0016787///hydrolase activity+++GO:0043531///ADP binding
AT1G12240	'AT1G12240.1'	mRNA	0.658005	0.0140308	63.68	70.27	77.5	101.26	152.68	119.87	93.35	101.64	133.24	70.4833	109.41	124.603	00052///Galactose metabolism+++00500///Starch and sucrose metabolism	GO:0004564///beta-fructofuranosidase activity+++GO:0004575///sucrose alpha-glucosidase activity
AT5G51550	'AT5G51550.1'	mRNA	0.655344	0.00061386	40.56	58.92	54.96	148.54	126.53	125.98	82.46	83.49	73.98	51.48	79.9767	133.683
AT5G60270	'AT5G60270.1'	mRNA	0.652167	0.000502188	11.24	10.33	12.15	14.7	16.47	15.15	17.23	18.62	16.7	11.24	17.5167	15.44	00630///Glyoxylate and dicarboxylate metabolism	GO:0004675///transmembrane receptor protein serine/threonine kinase activity+++GO:0005524///ATP binding+++GO:0030246///carbohydrate binding
AT1G64610	'AT1G64610.2'	mRNA	0.651118	0.00115061	7.55	7.37	7.89	8.75	11.16	7.31	11.89	11.06	12.15	7.60333	11.7	9.07333
AT1G55450	'AT1G55450.2'	mRNA	0.650642	0.000647948	83.91	77.63	91.57	107.13	122.13	152.8	134.48	117.99	139.98	84.37	130.817	127.353		GO:0008168///methyltransferase activity
AT1G10020	'AT1G10020.1'	mRNA	0.650035	1.14096e-05	16.2	19.58	18.98	41.43	39.58	36.08	29.58	29.33	26.05	18.2533	28.32	39.03
AT5G65730	'AT5G65730.1'	mRNA	0.644123	0.034799	38.06	44.07	58.1	59.48	75.85	88.55	67.34	70.3	78.92	46.7433	72.1867	74.6267		GO:0004553///hydrolase activity, hydrolyzing O-glycosyl compounds+++GO:0016762///xyloglucan:xyloglucosyl transferase activity
AT2G03240	'AT2G03240.1'	mRNA	0.640332	0.010505	10.65	13.31	13.62	16.38	22.59	18.13	16.98	18.83	21.85	12.5267	19.22	19.0333		GO:0000822///inositol hexakisphosphate binding+++GO:0015114///phosphate ion transmembrane transporter activity
AT4G19420	'AT4G19420.2'	mRNA	0.637942	2.25031e-06	69.37	87.44	75.45	164.69	151.63	137.88	113.95	131.39	108.16	77.42	117.833	151.4		GO:0052793///pectin acetylesterase activity
AT3G47570	'AT3G47570.1'	mRNA	0.63553	1.70003e-05	8.07	9.17	7.56	17.21	19.35	18.84	12.17	13.21	12.58	8.26667	12.6533	18.4667	04626///Plant-pathogen interaction	GO:0005524///ATP binding
AT1G25550	'AT1G25550.1'	mRNA	0.635318	0.00632074	105.94	104.31	139.91	145.37	160.47	153.67	170.61	185.39	183.36	116.72	179.787	153.17	04075///Plant hormone signal transduction	GO:0003677///DNA binding+++GO:0003700///DNA-binding transcription factor activity
AT1G11380	'AT1G11380.1'	mRNA	0.631365	0.0141103	11.95	14.01	14.82	31.62	29.93	34.78	21.8	18.78	21.69	13.5933	20.7567	32.11
AT3G20660	'AT3G20660.1'	mRNA	0.630706	0.00135385	10.13	10.79	11.72	13.32	12.57	14.15	18.46	16.49	15.14	10.88	16.6967	13.3467		GO:0005524///ATP binding+++GO:0022857///transmembrane transporter activity
AT4G25940	'AT4G25940.1'	mRNA	0.629792	0.00118651	15.73	15.24	15.88	20.5	23.94	22.58	25.52	20.86	25.22	15.6167	23.8667	22.34		GO:0000149///SNARE binding+++GO:0005545///1-phosphatidylinositol binding+++GO:0005546///phosphatidylinositol-4,5-bisphosphate binding+++GO:0032050///clathrin heavy chain binding
AT2G23130	'AT2G23130.2'	mRNA	0.620946	0.000749531	27.76	26.09	26.32	71.8	65.86	70.87	40.82	41.59	39.24	26.7233	40.55	69.51	00940///Phenylpropanoid biosynthesis
AT4G15233	'AT4G15233.2'	mRNA	0.620568	6.27664e-05	5.92	6.62	6.29	8.16	9.35	10.39	10.39	9.85	8.4	6.27667	9.54667	9.3		GO:0005524///ATP binding+++GO:0042626///ATPase activity, coupled to transmembrane movement of substances
AT1G55020	'AT1G55020.1'	mRNA	0.618917	0.0438263	21.06	26.98	17.27	9.82	13.62	7.83	42.16	27.15	29.37	21.77	32.8933	10.4233	00591///Linoleic acid metabolism	GO:0016702///oxidoreductase activity, acting on single donors with incorporation of molecular oxygen, incorporation of two atoms of oxygen+++GO:0046872///metal ion binding+++GO:1990136///linoleate 9S-lipoxygenase activity
AT4G19530	'AT4G19530.1'	mRNA	0.615365	0.0490335	13.55	14.25	19.32	30.2	37.08	34.04	25.8	20.32	25.48	15.7067	23.8667	33.7733	04626///Plant-pathogen interaction
AT1G56510	'AT1G56510.1'	mRNA	0.614959	0.0333948	11.92	11.31	12.9	21.88	29.58	30.32	17.5	15.23	21.84	12.0433	18.19	27.26		GO:0005524///ATP binding+++GO:0043531///ADP binding+++GO:0050135///NAD(P)+ nucleosidase activity+++GO:0061809///NAD+ nucleotidase, cyclic ADP-ribose generating
AT4G11650	'AT4G11650.1'	mRNA	0.614839	0.015697	185.01	223.64	188.22	53.68	113.47	35.34	261.99	265.72	365.4	198.957	297.703	67.4967	00520///Amino sugar and nucleotide sugar metabolism
AT5G20250	'AT5G20250.4'	mRNA	0.612881	0.00540685	245.37	212.86	285.21	780.29	850.21	747.9	373.09	420.18	339.76	247.813	377.677	792.8	00052///Galactose metabolism	GO:0047274///galactinol-sucrose galactosyltransferase activity
AT1G61100	'AT1G61100.2'	mRNA	0.612502	1.11039e-06	33.06	34.69	35.56	83.83	83.37	85.85	53.89	50.13	52.12	34.4367	52.0467	84.35	02010///ABC transporters
AT1G29690	'AT1G29690.1'	mRNA	0.610048	0.00833931	12.69	12.89	14.24	21.11	24.55	24.58	20.82	17.32	21.89	13.2733	20.01	23.4133	03022///Basal transcription factors
AT4G02330	'AT4G02330.1'	mRNA	0.606849	0.0122728	7.27	7.12	6.15	9.34	12.17	17.42	9.35	11.32	10.18	6.84667	10.2833	12.9767	00040///Pentose and glucuronate interconversions	GO:0030599///pectinesterase activity+++GO:0045330///aspartyl esterase activity+++GO:0046910///pectinesterase inhibitor activity
AT4G02200	'AT4G02200.3'	mRNA	0.605621	0.00525105	19.84	19.83	18	20.77	22.39	27.09	28.48	25.99	31.52	19.2233	28.6633	23.4167
AT3G44630	'AT3G44630.3'	mRNA	0.602219	1.21644e-05	22.25	24.25	24.06	31.2	40.03	34.61	35.74	33.3	36.66	23.52	35.2333	35.28		GO:0005524///ATP binding+++GO:0030275///LRR domain binding+++GO:0043531///ADP binding+++GO:0050135///NAD(P)+ nucleosidase activity+++GO:0061809///NAD+ nucleotidase, cyclic ADP-ribose generating
AT5G40850	'AT5G40850.2'	mRNA	0.599874	0.00565257	80.32	86.05	87.13	125.11	124.9	113.71	131.83	104.29	142.12	84.5	126.08	121.24	00860///Porphyrin metabolism+++01240///Biosynthesis of cofactors	GO:0004851///uroporphyrin-III C-methyltransferase activity
AT4G18340	'AT4G18340.1'	mRNA	0.599367	0.00525105	9.95	10.09	8.95	13.72	17.31	15.38	14.64	15.79	12.98	9.66333	14.47	15.47	00500///Starch and sucrose metabolism	GO:0042973///glucan endo-1,3-beta-D-glucosidase activity
AT1G22650	'AT1G22650.1'	mRNA	0.594219	0.0438263	13.2	11.87	15.95	20.71	19.52	19.47	21.44	18.35	21.6	13.6733	20.4633	19.9	00190///Oxidative phosphorylation	GO:0004575///sucrose alpha-glucosidase activity+++GO:0033926///glycopeptide alpha-N-acetylgalactosaminidase activity
AT4G30440	'AT4G30440.1'	mRNA	0.592411	0.0423008	83.85	78.43	112.99	142.34	158.28	185.09	130.64	135.04	146.14	91.7567	137.273	161.903	00053///Ascorbate and aldarate metabolism+++00520///Amino sugar and nucleotide sugar metabolism+++01240///Biosynthesis of cofactors+++01250///Biosynthesis of nucleotide sugars	GO:0050378///UDP-glucuronate 4-epimerase activity
AT5G15330	'AT5G15330.1'	mRNA	0.590533	0.0365652	10.6	9.76	11.58	19.58	20.57	18.82	16.71	14.61	16.26	10.6467	15.86	19.6567
AT5G67480	'AT5G67480.2'	mRNA	0.58339	0.00113576	62.44	66.14	52.81	101.59	128.05	115.31	79.62	91.06	96.22	60.4633	88.9667	114.983
AT4G24160	'AT4G24160.2'	mRNA	0.581181	0.0331271	20.49	22.24	20.37	22.95	32.36	30.5	36.77	24.15	32.04	21.0333	30.9867	28.6033		GO:0003841///1-acylglycerol-3-phosphate O-acyltransferase activity+++GO:0004623///phospholipase A2 activity+++GO:0016298///lipase activity+++GO:0042171///lysophosphatidic acid acyltransferase activity+++GO:0052689///carboxylic ester hydrolase activity
AT3G62420	'AT3G62420.1'	mRNA	0.579292	0.00192931	35.38	33.72	36.84	49.18	52.67	57.2	53.88	47.86	54.51	35.3133	52.0833	53.0167		GO:0000976///transcription regulatory region sequence-specific DNA binding+++GO:0003700///DNA-binding transcription factor activity+++GO:0043565///sequence-specific DNA binding+++GO:0045735///nutrient reservoir activity+++GO:0046982///protein heterodimerization activity
AT3G62422	'AT3G62422.1'	mRNA	0.579292	0.00192931	35.38	33.72	36.84	49.18	52.67	57.2	53.88	47.86	54.51	35.3133	52.0833	53.0167		GO:0000976///transcription regulatory region sequence-specific DNA binding+++GO:0003700///DNA-binding transcription factor activity+++GO:0043565///sequence-specific DNA binding+++GO:0045735///nutrient reservoir activity+++GO:0046982///protein heterodimerization activity
AT3G14050	'AT3G14050.1'	mRNA	0.574055	0.0135387	21.19	22.71	25.01	30.41	36.34	31.56	34.65	29.13	37.49	22.97	33.7567	32.77	00230///Purine metabolism	GO:0005524///ATP binding+++GO:0005525///GTP binding+++GO:0008728///GTP diphosphokinase activity+++GO:0016301///kinase activity
AT1G74950	'AT1G74950.1'	mRNA	0.57292	0.0477438	32.08	38.88	37.59	28.73	54.8	47.19	52.99	43.29	62.22	36.1833	52.8333	43.5733	04075///Plant hormone signal transduction	GO:0042802///identical protein binding
AT4G02380	'AT4G02380.2'	mRNA	0.572445	0.010505	946.76	693.64	741.68	1508.31	1284.8	1671.66	1164.51	1250.02	1086.58	794.027	1167.04	1488.26
AT1G03090	'AT1G03090.2'	mRNA	0.569865	0.0328522	22.15	24.68	29.17	80.86	85.51	80.2	32.58	38.17	40.86	25.3333	37.2033	82.19	00280///Valine, leucine and isoleucine degradation
AT1G07520	'AT1G07520.1'	mRNA	0.56799	0.02569	5.31	6.46	6.87	7.11	8.3	7.24	9.64	9.05	8.66	6.21333	9.11667	7.55
AT3G47080	'AT3G47080.1'	mRNA	0.56002	0.04999	10.61	11.9	12.99	14.69	17.98	15.34	16.75	15.29	19.54	11.8333	17.1933	16.0033
AT1G23480	'AT1G23480.3'	mRNA	0.559008	0.00502007	13.44	13.02	15.2	26.67	26.44	28.22	20.98	20.16	19.72	13.8867	20.2867	27.11
AT3G53810	'AT3G53810.1'	mRNA	0.557506	0.0050489	8.84	9.03	9.94	10.4	12.26	10.75	14.18	13.2	13.13	9.27	13.5033	11.1367	00500///Starch and sucrose metabolism	GO:0004675///transmembrane receptor protein serine/threonine kinase activity+++GO:0005524///ATP binding+++GO:0030246///carbohydrate binding
AT1G56520	'AT1G56520.2'	mRNA	0.556427	0.0066491	4.2	4.53	4.16	5.8	7.65	5.67	6.17	6.07	6.51	4.29667	6.25	6.37333		GO:0016787///hydrolase activity+++GO:0043531///ADP binding
AT1G35670	'AT1G35670.1'	mRNA	0.555429	0.000103761	24.47	25.33	24.58	38.81	47.88	46.96	38.42	33.97	35.57	24.7933	35.9867	44.55	04626///Plant-pathogen interaction	GO:0004672///protein kinase activity+++GO:0005509///calcium ion binding+++GO:0005524///ATP binding
AT3G25890	'AT3G25890.2'	mRNA	0.555	0.0161609	18.32	21.36	19.5	25.27	24.69	23.45	31.33	23.78	30.59	19.7267	28.5667	24.47	04626///Plant-pathogen interaction	GO:0003677///DNA binding+++GO:0003700///DNA-binding transcription factor activity
AT5G25930	'AT5G25930.1'	mRNA	0.55478	0.00632074	8.01	7.95	8.44	8.92	11.63	9.64	13.52	10.78	11.21	8.13333	11.8367	10.0633		GO:0004672///protein kinase activity+++GO:0005524///ATP binding
AT4G27410	'AT4G27410.3'	mRNA	0.547366	0.0492723	28.84	26.07	28.52	23.25	39.44	29.11	35.14	44.71	40.49	27.81	40.1133	30.6		GO:0003677///DNA binding
AT1G14370	'AT1G14370.1'	mRNA	0.546925	0.0212314	16.21	16.86	15.38	16.28	20.07	19.61	25.73	19.38	24.64	16.15	23.25	18.6533		GO:0005524///ATP binding+++GO:0030957///Tat protein binding
AT2G15390	'AT2G15390.2'	mRNA	0.546847	0.034032	21.78	18.74	15.6	18.06	23.54	19.13	31.71	24.98	24.52	18.7067	27.07	20.2433		GO:0008107///galactoside 2-alpha-L-fucosyltransferase activity+++GO:0008417///fucosyltransferase activity+++GO:0031127///alpha-(1,2)-fucosyltransferase activity
AT1G63860	'AT1G63860.2'	mRNA	0.545533	0.041509	4.33	4.92	5	11.13	12.59	14.34	7.06	6.06	7.36	4.75	6.82667	12.6867		GO:0016787///hydrolase activity+++GO:0043531///ADP binding
AT3G13750	'AT3G13750.1'	mRNA	0.544817	0.00297922	109.89	125.6	119.48	284.12	350.85	301.47	154.03	204.18	154.09	118.323	170.767	312.147	00052///Galactose metabolism+++00511///Other glycan degradation+++00531///Glycosaminoglycan degradation+++00600///Sphingolipid metabolism+++00604///Glycosphingolipid biosynthesis - ganglio series	GO:0004565///beta-galactosidase activity+++GO:0030246///carbohydrate binding
AT5G66675	'AT5G66675.1'	mRNA	0.539282	0.016263	17.39	17.67	19.78	22.97	25.33	24.93	26.6	23.99	28.13	18.28	26.24	24.41
AT4G18950	'AT4G18950.1'	mRNA	0.536792	0.0252998	24.27	22.38	23.09	24.54	35.42	32.76	33.27	28.99	37.48	23.2467	33.2467	30.9067		GO:0004672///protein kinase activity+++GO:0004674///protein serine/threonine kinase activity+++GO:0004712///protein serine/threonine/tyrosine kinase activity+++GO:0005524///ATP binding
AT1G09940	'AT1G09940.1'	mRNA	0.536374	0.0193809	15.81	13.31	14.69	24.17	25.39	22.95	22.35	19.01	21.54	14.6033	20.9667	24.17	00860///Porphyrin metabolism+++01240///Biosynthesis of cofactors	GO:0008883///glutamyl-tRNA reductase activity+++GO:0050661///NADP binding
AT4G03210	'AT4G03210.2'	mRNA	0.531273	0.02592	132.61	173.33	108.36	300.42	269.06	210.29	185.87	222.57	178.26	138.1	195.567	259.923		GO:0004553///hydrolase activity, hydrolyzing O-glycosyl compounds+++GO:0016762///xyloglucan:xyloglucosyl transferase activity
AT4G29950	'AT4G29950.2'	mRNA	0.530797	0.00383655	42.7	43.77	50.93	69.26	85.92	72.85	63.57	66.18	66.82	45.8	65.5233	76.01
AT1G21130	'AT1G21130.2'	mRNA	0.530242	0.0192903	216.39	248.94	294.09	325	353.53	418.37	393.72	335.63	358.63	253.14	362.66	365.633		GO:0008171///O-methyltransferase activity+++GO:0008757///S-adenosylmethionine-dependent methyltransferase activity+++GO:0046983///protein dimerization activity
AT5G18470	'AT5G18470.1'	mRNA	0.52812	0.0108997	18.58	19.45	17.41	16.15	17.11	23.71	27.01	23.54	28.14	18.48	26.23	18.99		GO:0030246///carbohydrate binding
AT2G32800	'AT2G32800.1'	mRNA	0.527082	0.0333237	7.04	6.43	7.9	10.08	14.23	11.66	10.44	10.3	9.82	7.12333	10.1867	11.99	04016///MAPK signaling pathway - plant+++04075///Plant hormone signal transduction+++04626///Plant-pathogen interaction	GO:0004675///transmembrane receptor protein serine/threonine kinase activity+++GO:0005524///ATP binding
AT1G59620	'AT1G59620.1'	mRNA	0.526912	0.0164132	4.81	5.76	5.52	7.12	7.28	7.14	7.94	7.52	7.43	5.36333	7.63	7.18
AT5G01810	'AT5G01810.3'	mRNA	0.52646	0.00323148	36.7	40.59	43.72	95.94	83.53	64.33	65.08	55.81	51.92	40.3367	57.6033	81.2667	04213///Longevity regulating pathway - multiple species	GO:0004672///protein kinase activity+++GO:0005524///ATP binding
AT1G22882	'AT1G22882.1'	mRNA	0.52609	0.0139268	11.43	12.29	10.03	24.6	24.67	26.07	15.38	15.02	17.38	11.25	15.9267	25.1133		GO:0043621///protein self-association
AT5G04720	'AT5G04720.1'	mRNA	0.52143	0.000238175	28.23	30.71	31.74	34.86	43.64	37.79	43.23	42.47	42.95	30.2267	42.8833	38.7633		GO:0005524///ATP binding+++GO:0043531///ADP binding
AT3G28160	'AT3G28160.1'	mRNA	0.511115	0.0446266	14.46	17.59	19.37	36.84	31.22	28.49	22.79	24.48	25.11	17.14	24.1267	32.1833
AT4G15760	'AT4G15760.2'	mRNA	0.510622	0.0172188	81.72	83.86	92.73	122.09	157.04	148.7	144.51	109.12	111.37	86.1033	121.667	142.61		GO:0004497///monooxygenase activity+++GO:0071949///FAD binding
AT5G24590	'AT5G24590.2'	mRNA	0.501654	0.0339945	20.19	23.27	23.57	28.83	32.44	28.37	30.65	28.31	34.5	22.3433	31.1533	29.88		GO:0000976///transcription regulatory region sequence-specific DNA binding+++GO:0003677///DNA binding+++GO:0003700///DNA-binding transcription factor activity+++GO:0003713///transcription coactivator activity
AT3G44970	'AT3G44970.1'	mRNA	0.499525	0.0202636	13.8	14.98	13.21	8.48	9.21	11.13	20	21.84	16.83	13.9967	19.5567	9.60667		GO:0004497///monooxygenase activity+++GO:0005506///iron ion binding+++GO:0016491///oxidoreductase activity+++GO:0016705///oxidoreductase activity, acting on paired donors, with incorporation or reduction of molecular oxygen+++GO:0020037///heme binding
AT5G15870	'AT5G15870.1'	mRNA	0.491785	0.0250985	12.4	10.63	10.73	11.32	17.44	13.86	16.63	14.89	15.44	11.2533	15.6533	14.2067		GO:0052861///glucan endo-1,3-beta-glucanase activity, C-3 substituted reducing group+++GO:0052862///glucan endo-1,4-beta-glucanase activity, C-3 substituted reducing group
AT5G63020	'AT5G63020.1'	mRNA	0.491526	0.00570046	12.98	13.31	14.3	18.77	22.21	19.47	18.69	18.67	19.07	13.53	18.81	20.15	04016///MAPK signaling pathway - plant	GO:0005524///ATP binding+++GO:0043531///ADP binding
AT1G12990	'AT1G12990.1'	mRNA	0.490989	0.0227006	12.24	10.58	10.83	23.29	25.35	25.14	16.63	15.9	14.33	11.2167	15.62	24.5933	00510///N-Glycan biosynthesis	GO:0003830///beta-1,4-mannosylglycoprotein 4-beta-N-acetylglucosaminyltransferase activity+++GO:0016757///transferase activity, transferring glycosyl groups
AT3G28180	'AT3G28180.1'	mRNA	0.490363	0.0130001	36.44	31.51	34.92	45.41	67.2	69.5	47.06	45.92	49.98	34.29	47.6533	60.7033		GO:0016757///transferase activity, transferring glycosyl groups+++GO:0042803///protein homodimerization activity
AT5G07440	'AT5G07440.3'	mRNA	0.486998	0.00493632	296.56	345.47	299.52	432.13	565.19	471.37	456.09	377.91	459.51	313.85	431.17	489.563	00220///Arginine biosynthesis+++00250///Alanine, aspartate and glutamate metabolism+++00910///Nitrogen metabolism+++01200///Carbon metabolism	GO:0004352///glutamate dehydrogenase (NAD+) activity+++GO:0004353///glutamate dehydrogenase [NAD(P)+] activity+++GO:0004354///glutamate dehydrogenase (NADP+) activity+++GO:0005507///copper ion binding+++GO:0005524///ATP binding+++GO:0008270///zinc ion binding+++GO:0050897///cobalt ion binding
AT3G57930	'AT3G57930.2'	mRNA	0.485959	0.0141103	26.06	24.15	24.32	49.91	55.97	78.31	34.3	36.08	32.92	24.8433	34.4333	61.3967
AT1G15290	'AT1G15290.1'	mRNA	0.4805	0.0122728	32.05	42.34	39.56	52.55	58.86	46.28	49.27	57.47	50.24	37.9833	52.3267	52.5633
AT5G25050	'AT5G25050.1'	mRNA	0.478984	0.0362635	7.73	7.59	7.8	10.62	11.99	11.39	11.12	10.53	10.22	7.70667	10.6233	11.3333
AT1G68580	'AT1G68580.2'	mRNA	0.476592	0.00690156	32.77	32.08	35.5	52.1	56.07	52.48	44.78	45.24	47.71	33.45	45.91	53.55		GO:0003682///chromatin binding
AT1G12220	'AT1G12220.2'	mRNA	0.473966	0.0362635	8.34	8.81	10.02	9.16	12.1	12.36	12.73	12.29	12.31	9.05667	12.4433	11.2067	04626///Plant-pathogen interaction	GO:0000166///nucleotide binding+++GO:0005524///ATP binding+++GO:0038023///signaling receptor activity+++GO:0042802///identical protein binding+++GO:0043531///ADP binding
AT1G78850	'AT1G78850.1'	mRNA	0.465921	0.00546387	136.03	139.63	155.06	125.73	197.19	187.76	198.41	191.38	198.54	143.573	196.11	170.227		GO:0005539///glycosaminoglycan binding+++GO:0030246///carbohydrate binding
AT1G24170	'AT1G24170.1'	mRNA	0.465498	0.00122504	31.96	34.35	32.73	59.4	64.21	60.88	47.01	43.07	44.88	33.0133	44.9867	61.4967		GO:0047262///polygalacturonate 4-alpha-galacturonosyltransferase activity
AT5G58350	'AT5G58350.1'	mRNA	0.46254	0.0231388	30.89	32.53	27.48	33.16	41.64	28.19	41.8	36.48	44.92	30.3	41.0667	34.33		GO:0004672///protein kinase activity+++GO:0004674///protein serine/threonine kinase activity+++GO:0005524///ATP binding
AT3G14090	'AT3G14090.1'	mRNA	0.461539	0.0202151	13.04	12.04	12.82	16.28	19.78	17.41	18.62	17.01	16.09	12.6333	17.24	17.8233
AT1G68670	'AT1G68670.1'	mRNA	0.460721	0.0487526	71.18	83.13	93.89	88.82	103.83	86.99	113.91	107.84	115.85	82.7333	112.533	93.2133	04075///Plant hormone signal transduction	GO:0000976///transcription regulatory region sequence-specific DNA binding+++GO:0001217///bacterial-type RNA polymerase transcriptional repressor activity, sequence-specific DNA binding+++GO:0003700///DNA-binding transcription factor activity
AT3G26910	'AT3G26910.2'	mRNA	0.460244	0.0333237	9.65	9.91	9.97	14.75	15.54	13.1	13.34	12.84	13.93	9.84333	13.37	14.4633
AT3G24530	'AT3G24530.1'	mRNA	0.456779	0.0376662	14.92	13.96	14.24	18.77	21.93	18.82	20.86	18	19.64	14.3733	19.5	19.84		GO:0005524///ATP binding+++GO:0016887///ATPase activity
AT5G38850	'AT5G38850.1'	mRNA	0.452174	0.0276331	5.56	6.57	6.09	7.76	9.59	8.53	8.15	8.44	8.01	6.07333	8.2	8.62667		GO:0016787///hydrolase activity+++GO:0043531///ADP binding
AT2G02710	'AT2G02710.3'	mRNA	0.450333	0.0253835	58.75	56.7	64.3	92.71	97.16	99.79	76.82	83.78	83.13	59.9167	81.2433	96.5533		GO:0009881///photoreceptor activity
AT3G55430	'AT3G55430.1'	mRNA	0.447504	0.00456793	44.66	45.54	41.06	69.59	83.41	70.76	58.98	55.75	61.62	43.7533	58.7833	74.5867	00500///Starch and sucrose metabolism	GO:0042973///glucan endo-1,3-beta-D-glucosidase activity
AT1G03220	'AT1G03220.1'	mRNA	0.4466	0.00817754	92.27	87.5	83.9	82.51	133.22	82.71	122.43	108.92	123.15	87.89	118.167	99.48		GO:0004190///aspartic-type endopeptidase activity
AT5G40340	'AT5G40340.1'	mRNA	0.446044	0.00984127	15.19	18.36	16.89	25.78	28.62	28.08	23.41	21.38	22.98	16.8133	22.59	27.4933
AT5G02290	'AT5G02290.2'	mRNA	0.445828	0.0244278	41.84	37.39	39.79	50.2	61.54	65.28	57.71	49.61	53.09	39.6733	53.47	59.0067		GO:0005524///ATP binding
AT2G01850	'AT2G01850.1'	mRNA	0.442508	0.00061386	160.57	162.42	169.56	218.59	248.6	246.8	223.56	224.42	213.94	164.183	220.64	237.997		GO:0004553///hydrolase activity, hydrolyzing O-glycosyl compounds+++GO:0016762///xyloglucan:xyloglucosyl transferase activity
AT1G13210	'AT1G13210.1'	mRNA	0.43706	0.000427894	23.7	27.09	24.53	30.27	33.36	33.17	35.13	32.49	33.05	25.1067	33.5567	32.2667		GO:0000287///magnesium ion binding+++GO:0005524///ATP binding
AT4G28080	'AT4G28080.1'	mRNA	0.436451	0.0442104	67.95	78.82	86.66	125.37	137.96	111.13	98.93	106.65	106.89	77.81	104.157	124.82		GO:0003729///mRNA binding
AT4G09570	'AT4G09570.1'	mRNA	0.425799	0.04999	19.8	21.62	18.83	23.88	26.86	32.01	26.96	24.33	28.35	20.0833	26.5467	27.5833	04626///Plant-pathogen interaction	GO:0004683///calmodulin-dependent protein kinase activity+++GO:0005509///calcium ion binding+++GO:0005516///calmodulin binding+++GO:0005524///ATP binding+++GO:0009931///calcium-dependent protein serine/threonine kinase activity
AT4G26690	'AT4G26690.1'	mRNA	0.409563	0.0088764	21.95	25.88	23.19	41.9	54.6	50.49	31.8	29.73	31.48	23.6733	31.0033	48.9967		GO:0008889///glycerophosphodiester phosphodiesterase activity
AT5G64300	'AT5G64300.1'	mRNA	0.404162	0.0495181	46.42	44.96	48.81	52.4	62.83	57.25	63.73	56.46	63.25	46.73	61.1467	57.4933	00740///Riboflavin metabolism+++00790///Folate biosynthesis+++01240///Biosynthesis of cofactors	GO:0003935///GTP cyclohydrolase II activity+++GO:0005525///GTP binding+++GO:0008686///3,4-dihydroxy-2-butanone-4-phosphate synthase activity+++GO:0046872///metal ion binding
AT3G25070	'AT3G25070.1'	mRNA	0.402046	0.0474855	54.99	50.89	51.16	53.05	54.55	57.73	68.81	65.51	70.42	52.3467	68.2467	55.11	04626///Plant-pathogen interaction
AT2G42580	'AT2G42580.1'	mRNA	0.394031	0.0344586	25.58	31.39	28.67	55.77	58.52	65.6	35.07	38.43	37.41	28.5467	36.97	59.9633
AT2G22300	'AT2G22300.2'	mRNA	0.39317	0.0339945	22.14	26.66	23.44	32.5	39.66	36.94	30.84	29.59	32.92	24.08	31.1167	36.3667		GO:0003690///double-stranded DNA binding+++GO:0003700///DNA-binding transcription factor activity+++GO:0003712///transcription coregulator activity+++GO:0005516///calmodulin binding+++GO:0043565///sequence-specific DNA binding
AT5G13100	'AT5G13100.1'	mRNA	0.390504	0.0273208	46.56	48.46	50.24	77.13	66.99	63.83	65.46	59.84	62.83	48.42	62.71	69.3167
AT1G55490	'AT1G55490.2'	mRNA	0.38929	0.0446266	234.21	238.47	236.67	352.19	352.06	321.59	272.72	327.69	316.42	236.45	305.61	341.947	03018///RNA degradation	GO:0003729///mRNA binding+++GO:0005524///ATP binding+++GO:0016887///ATPase activity+++GO:0019904///protein domain specific binding
AT4G15530	'AT4G15530.6'	mRNA	0.388716	0.00259834	73.91	84.05	75.52	100.18	118.75	100.08	99.77	101.05	102.42	77.8267	101.08	106.337	00010///Glycolysis / Gluconeogenesis+++00620///Pyruvate metabolism+++00710///Carbon fixation in photosynthetic organisms+++01200///Carbon metabolism
AT3G06380	'AT3G06380.1'	mRNA	0.386571	0.0140308	31.98	32.03	31.92	46.15	51.53	40.87	42.21	42.3	39.47	31.9767	41.3267	46.1833		GO:0000976///transcription regulatory region sequence-specific DNA binding
AT1G55850	'AT1G55850.1'	mRNA	0.380387	0.0146307	77.53	83.58	79.04	67.72	85.37	78.68	107.92	95.19	105.32	80.05	102.81	77.2567		GO:0016760///cellulose synthase (UDP-forming) activity+++GO:0051753///mannan synthase activity
AT4G30210	'AT4G30210.2'	mRNA	0.379225	0.043017	62.82	79.53	72.53	93.99	106.83	94.03	93.29	87.94	94.15	71.6267	91.7933	98.2833
AT3G02130	'AT3G02130.1'	mRNA	0.36708	0.0337911	9.96	11.62	10.34	17.21	17.72	15.65	13.51	13.83	13.29	10.64	13.5433	16.86		GO:0005524///ATP binding
AT3G45300	'AT3G45300.1'	mRNA	0.366376	0.0334884	25.73	27.86	23.6	48.16	54.73	51.48	31.41	32.7	33.88	25.73	32.6633	51.4567	00280///Valine, leucine and isoleucine degradation	GO:0005524///ATP binding+++GO:0008470///isovaleryl-CoA dehydrogenase activity+++GO:0050660///flavin adenine dinucleotide binding
AT5G53550	'AT5G53550.2'	mRNA	0.365201	0.0116633	81.5	84.08	86.16	81.26	78.15	96.92	109.91	105.08	105.88	83.9133	106.957	85.4433		GO:0051980///iron-nicotianamine transmembrane transporter activity
AT5G65660	'AT5G65660.1'	mRNA	0.35425	0.0185576	96.34	103.69	95.5	118.98	160.8	97.45	127.4	130.44	114.43	98.51	124.09	125.743
AT3G57550	'AT3G57550.2'	mRNA	0.353792	0.0343068	62.94	60.61	59.59	84.07	80.99	81.77	81.49	73.34	76.44	61.0467	77.09	82.2767	00230///Purine metabolism	GO:0004385///guanylate kinase activity+++GO:0005524///ATP binding
AT1G09970	'AT1G09970.2'	mRNA	0.345058	0.00504046	98.73	116.4	102.16	97.71	122.81	99.5	137.64	130.75	129.22	105.763	132.537	106.673
AT4G14500	'AT4G14500.2'	mRNA	0.323999	0.0361396	43.73	44.73	43.04	72.47	72.71	66.55	54.78	54.48	53.32	43.8333	54.1933	70.5767	00480///Glutathione metabolism	GO:0008289///lipid binding
AT4G16760	'AT4G16760.2'	mRNA	0.313123	0.0152283	81.56	92.95	82.62	73.09	86.86	78.57	104.15	107.93	103.01	85.71	105.03	79.5067	00071///Fatty acid degradation+++00410///beta-Alanine metabolism+++00592///alpha-Linolenic acid metabolism+++00640///Propanoate metabolism+++01040///Biosynthesis of unsaturated fatty acids+++01200///Carbon metabolism+++01212///Fatty acid metabolism+++04146///Peroxisome	GO:0003997///acyl-CoA oxidase activity+++GO:0005504///fatty acid binding+++GO:0016401///palmitoyl-CoA oxidase activity+++GO:0050660///flavin adenine dinucleotide binding+++GO:0071949///FAD binding
