# Supplementary material for: Antagonistic Regulation of ABA Responses by Duplicated Tandemly Repeated DUF538 Protein Genes in Arabidopsis
Source: Plants (Basel). 2023 Aug 19;12(16):2989. doi: 10.3390/plants12162989 (PMC10459309; doi:10.3390/plants12162989)
Supplement: Supplementary file 1 [file plants-12-02989-s001.zip › Table S2.xls]

## Sheet: Down-regulated genes in OE line
gene_symbol	log2(Col(+ABA)/Col)	Qvalue(Col(+ABA)/Col)	tpm_Col-1	tpm_Col-2	tpm_Col-3	tpm_Col(+ABA)-1	tpm_Col(+ABA)-2	tpm_Col(+ABA)-3	average_tpm_Col	average_tpm_Col(+ABA)
AT4G38860	-3.37222	1.33657e-07	2.78	3.89	2.98	0.23	0.23	0.38	3.21667	0.28
AT1G29460	-3.27705	4.22839e-08	4.31	8.32	6.62	0.86	0.12	0.84	6.41667	0.606667
AT5G18030	-2.52752	0.00536925	2.13	3.09	0.97	0.6	0	0.39	2.06333	0.33
AT5G11420	-2.51237	3.36205e-28	83.04	94.38	67.16	13.61	8.85	16.21	81.5267	12.89
AT2G03310	-2.16847	6.97609e-08	8.04	11.25	15.54	3.35	0.97	2.62	11.61	2.31333
AT5G02890	-1.58415	0.000667487	3.36	2.08	2.18	0.82	0.56	0.9	2.54	0.76
AT2G15020	-1.58266	7.21384e-12	11.4	14.11	21.13	4.65	4.78	4.39	15.5467	4.60667
AT2G21210	-1.5184	8.96034e-05	8.29	10.63	8.63	1.9	3.64	2.93	9.18333	2.82333
AT4G27900	-1.44907	7.48198e-21	38.37	39.25	41.01	12.88	12.75	13.29	39.5433	12.9733
AT4G32460	-1.39191	9.19292e-12	41.93	36.7	28.74	15.04	11.34	11.11	35.79	12.4967
AT3G13980	-1.22387	0.000287344	4.81	5.26	5.31	1.54	1.81	2.53	5.12667	1.96
AT4G13500	-1.15655	4.42644e-10	58.08	58.32	55.87	27.29	20.03	22.24	57.4233	23.1867
AT4G26540	-1.03322	1.77994e-06	10.8	7.36	11.07	5.14	4.41	3.21	9.74333	4.25333
AT4G32340	-0.95664	5.32649e-09	55.57	68.24	64.81	27.91	28.33	30.83	62.8733	29.0233
AT1G69160	-0.747694	0.000285936	31.26	39.48	31.58	15.94	17.79	20.94	34.1067	18.2233
AT2G19650	-0.648014	0.0110912	5.69	4.59	7.66	4	3.22	2.96	5.98	3.39333
AT1G11700	-0.631517	0.0166623	12.22	13.5	11.34	9.14	5.62	6.86	12.3533	7.20667
AT5G23240	-0.355235	0.112157	29.99	37.78	54.09	29.75	26.5	28.46	40.62	28.2367
AT3G56210	-0.317456	0.142271	40.37	49.12	36.88	34.16	31.78	25.55	42.1233	30.4967
AT4G12290	-0.300439	0.228172	11.16	16.03	18.1	10.21	9.94	12.96	15.0967	11.0367
AT1G16500	-0.185093	0.636469	4.86	5.41	5.26	4.7	4.59	3	5.17667	4.09667
AT4G16880	-0.178702	0.843956	0.8	0.82	0.97	0.6	0.79	0.65	0.863333	0.68
AT5G48900	-0.0235132	0.942004	13.82	15.07	12.26	15.17	9.2	12.22	13.7167	12.1967
AT3G61550	0.256547	0.368696	7.86	7.2	9.94	9.77	7.68	9.19	8.33333	8.88
AT1G26800	0.354751	0.111192	35.19	40.62	27.5	39.73	40	39.52	34.4367	39.75
AT5G54585	0.375364	0.276048	9.09	13.87	9	16.07	9.68	11.96	10.6533	12.57
AT4G16190	0.430029	0.00349198	866.58	970.1	921.61	1085.86	1199.38	1045.72	919.43	1110.32
AT1G76240	0.44192	0.0834234	7.09	5.76	8.1	9.2	8.2	7.98	6.98333	8.46
AT5G22580	0.536799	0.177668	12.8	11	4.88	11.21	15.62	10.86	9.56	12.5633
AT4G28240	0.564165	6.17013e-05	286.6	297.66	278.34	383.97	360.16	400.11	287.533	381.413
AT2G23840	0.697433	0.00846623	9.32	16.27	16.04	20.15	16.48	23.81	13.8767	20.1467
AT5G20790	0.742552	0.066816	6.48	4.88	10.35	12.39	6	6.57	7.23667	8.32
AT1G13930	0.762377	7.65262e-08	306.09	310.13	270.96	469.1	411.28	456.78	295.727	445.72
AT5G20700	0.78818	1.10356e-06	116.93	119.83	110.47	209.98	146.64	183.39	115.743	180.003
AT3G12320	1.00244	0.000130675	24.37	29.9	24.57	39.67	35.63	64.73	26.28	46.6767
AT5G03230	1.0133	5.70081e-05	25.76	34.01	24.45	48.18	37.51	67.3	28.0733	50.9967
AT3G05170	1.02057	1.25833e-05	5.88	6.68	5.93	13.6	11.11	9.12	6.16333	11.2767
AT1G73120	1.08096	3.6159e-11	119.56	150.3	145.27	241.47	283.21	261.6	138.377	262.093
AT1G79160	1.11756	2.46848e-14	51.78	61.85	57.46	111.63	113.69	107.8	57.03	111.04
AT5G41400	1.11926	3.31966e-06	10.46	7.96	7.72	20.18	15.86	15.08	8.71333	17.04
AT4G35720	1.83934	1.31979e-09	10.53	6.01	3.81	20.28	21.53	23.76	6.78333	21.8567
AT3G14200	1.86168	7.21313e-25	7.31	8.04	7.88	28.44	25.34	22.11	7.74333	25.2967
AT4G33040	1.95173	5.79749e-21	5.24	6.84	5.6	21.64	21.58	18.35	5.89333	20.5233
AT5G15950	2.07061	9.84737e-26	10.94	13.63	10.79	43.05	37.27	53.01	11.7867	44.4433
AT1G63840	2.08738	4.66861e-53	25.01	22.83	24.44	95.77	94.39	85.03	24.0933	91.73
AT1G70420	2.27362	9.89839e-40	11.63	11.9	11.75	46.81	58.2	47.62	11.76	50.8767
AT5G64170	2.56379	2.80902e-27	3.19	4.79	3.76	19.38	16.06	26.59	3.91333	20.6767
AT3G09440	3.00692	4.53758e-67	43.77	29.9	34.44	315.88	215.07	245.27	36.0367	258.74
AT4G09500	3.36968	3.40877e-47	5.38	2.76	3.22	36.84	29.51	39.06	3.78667	35.1367
AT1G78070	4.08079	8.87677e-194	6.5	7.21	8.12	112.97	109.81	107.52	7.27667	110.1

## Sheet: Up-regulated genes in OE line
gene_symbol	log2(Col(+ABA)/Col)	Qvalue(Col(+ABA)/Col)	tpm_Col-1	tpm_Col-2	tpm_Col-3	tpm_Col(+ABA)-1	tpm_Col(+ABA)-2	tpm_Col(+ABA)-3	average_tpm_Col	average_tpm_Col(+ABA)
AT3G20395	-2.74555	1.16346e-38	67.11	63.97	52.14	8.66	6.65	9.28	61.0733	8.19667
AT5G35480	-2.7359	0.000315668	3.75	4.29	4.37	0.17	0.5	0.99	4.13667	0.553333
AT1G50040	-1.96112	9.12928e-25	18.28	16.28	21.07	4.74	4.47	3.56	18.5433	4.25667
AT1G72430	-1.79824	1.54075e-21	63.29	87.08	74.71	17.81	18.71	21.53	75.0267	19.35
AT1G07520	-1.47954	0.0120408	0.8	0.9	1.1	0.17	0.48	0.31	0.933333	0.32
AT5G14120	-1.43975	9.09487e-19	216.46	212.21	278.08	67.63	90.49	73.31	235.583	77.1433
AT4G19420	-1.43577	9.08812e-16	52.39	74.95	59.48	20.65	21.3	20.85	62.2733	20.9333
AT4G19530	-1.3494	2.20421e-11	19.9	22.32	33.99	9.01	7.52	9.99	25.4033	8.84
AT3G47570	-1.19192	4.50434e-09	5.65	5.45	6.88	2.71	2.24	2.08	5.99333	2.34333
AT5G11250	-1.14233	2.34558e-07	4.19	3.64	5.24	1.9	1.75	1.59	4.35667	1.74667
AT2G34510	-1.11043	3.53144e-10	25.15	22.4	20.95	10.39	8.85	8.48	22.8333	9.24
AT1G15890	-0.830824	0.0171285	2.35	2.62	1.81	1.01	1.39	1.01	2.26	1.13667
AT4G18340	-0.776652	0.00351026	16.1	17.05	19.2	10.37	11.75	5.49	17.45	9.20333
AT3G10040	-0.75547	0.2137	2.85	1.68	0.92	1.71	0.54	0.71	1.81667	0.986667
AT1G56520	-0.724598	0.00564272	2.42	2.48	2.98	1.3	1.56	1.38	2.62667	1.41333
AT5G50520	-0.663364	0.00207338	9.11	9	8.72	5.47	4.68	5.08	8.94333	5.07667
AT4G36850	-0.610389	0.00943995	307.04	356.96	426.9	155.27	199.52	278.68	363.633	211.157
AT4G02200	-0.520526	0.0072602	23.46	23.18	21.98	13.52	14.59	14.71	22.8733	14.2733
AT3G48390	-0.515595	0.00955833	20.2	17.69	26.39	11.66	14.78	13.42	21.4267	13.2867
AT5G54710	-0.515343	0.0143471	28.02	18.12	29.62	14.67	16.87	15.06	25.2533	15.5333
AT5G13100	-0.457822	0.0110079	61.41	51.82	57.04	35.35	43.6	31.88	56.7567	36.9433
AT3G57930	-0.343247	0.103155	19.16	16.82	20.39	15.31	10.78	13.46	18.79	13.1833
AT1G15290	-0.305924	0.179131	30.98	21.86	35.55	22.24	16.45	24.76	29.4633	21.15
AT1G11380	-0.298263	0.0792161	49.41	53.72	55.01	42.33	40.19	32.93	52.7133	38.4833
AT1G19380	-0.205114	0.427792	118.63	121.62	95.09	71.93	107.13	81.9	111.78	86.9867
AT2G43620	-0.186631	0.823069	123.19	52.3	60.59	74.57	33.52	78.19	78.6933	62.0933
AT3G19680	-0.114761	0.530193	46.02	45.86	54.6	42.54	36.19	42.15	48.8267	40.2933
AT5G39890	-0.0673084	0.920972	4.73	4.22	1.51	3.84	1.64	3.5	3.48667	2.99333
AT2G26190	-0.00907016	0.965937	27.74	27.57	32.99	24.48	28.89	24.38	29.4333	25.9167
AT1G02610	0.00491894	0.984669	35	41.23	55.07	39.18	36.29	42.75	43.7667	39.4067
AT5G63020	0.00533612	0.981436	20.02	21.6	29.27	21.7	19.3	22.33	23.63	21.11
AT1G63860	0.0252505	0.934907	8.01	6.05	7.75	6.48	5.14	8.07	7.27	6.56333
AT3G44970	0.0870422	0.759746	8.14	9.42	8.62	8.47	7.7	8.73	8.72667	8.3
AT4G28080	0.114812	0.746141	73.99	46.1	107.18	82.77	52.16	82.5	75.7567	72.4767
AT5G66675	0.134164	0.607256	19.59	19.71	21.91	16.08	23.05	19.02	20.4033	19.3833
AT1G68580	0.140482	0.437575	23.25	23.76	28.82	24.32	25.08	25.22	25.2767	24.8733
AT1G68670	0.161844	0.425175	86	94.8	104.63	81.53	105.41	97.53	95.1433	94.8233
AT1G72940	0.24196	0.261677	11.83	10.9	14.22	12.5	14.47	11.95	12.3167	12.9733
AT4G19160	0.252226	0.14863	278.83	327.14	408.43	360.91	340.35	373.62	338.133	358.293
AT1G65490	0.255092	0.386049	44.33	34.99	28.65	43.09	32.31	40.58	35.99	38.66
AT5G23130	0.260751	0.266417	7.3	6.55	8.81	8.15	7.85	8.18	7.55333	8.06
AT1G10020	0.276705	0.125011	18.51	18.2	22.53	21.06	19.56	23.33	19.7467	21.3167
AT1G55450	0.287804	0.231251	68.8	57.75	51.49	51.3	76.56	66.28	59.3467	64.7133
AT1G63750	0.396084	0.0401536	5.46	4.54	6.31	6.38	5.99	6.25	5.43667	6.20667
AT5G25240	0.491037	0.107639	9.05	11.26	11.23	13.11	10.73	15.87	10.5133	13.2367
AT1G12990	0.500624	0.00587153	8.66	9.17	9.87	11.59	11.67	11.78	9.23333	11.68
AT3G44630	0.5513	0.000725202	14.8	14.55	20.68	21.73	21.28	22.07	16.6767	21.6933
AT2G25735	0.561215	0.0277732	16.99	20.41	15.41	18.16	28.56	23.15	17.6033	23.29
AT1G67470	0.561994	0.0149646	8.72	6.34	7.01	9.7	10.89	8.59	7.35667	9.72667
AT4G14500	0.567097	1.89063e-05	56.22	53.66	61.88	73.49	76.16	77.73	57.2533	75.7933
AT2G47440	0.616482	0.000102794	41.24	31.98	47.86	55.08	53.84	56.08	40.36	55
AT4G33720	0.636956	0.587567	8.69	7.63	5.95	12.31	17.3	1.77	7.42333	10.46
AT4G32800	0.650346	0.0927495	2.44	2.78	1.84	4.2	2.99	2.86	2.35333	3.35
AT2G24600	0.681872	0.0167581	9.98	6.72	5.53	11.01	13.02	8.2	7.41	10.7433
AT5G60270	0.684567	9.65008e-05	18.9	17.64	22.16	27.41	32.94	23.78	19.5667	28.0433
AT5G38850	0.725079	0.000171875	6.25	8.41	9.55	12.49	10.91	12.37	8.07	11.9233
AT1G18020	0.728777	0.0104066	36.38	40.05	25.61	40.91	39.69	71.24	34.0133	50.6133
AT5G15870	0.731019	7.68936e-05	14.63	10.01	13.58	19.17	20.72	16.69	12.74	18.86
AT1G25550	0.739291	6.91662e-06	77.64	93.77	94.65	120.46	148.51	128.08	88.6867	132.35
AT2G28120	0.74734	4.37358e-06	17.73	19.75	20.28	26.55	30.72	29.37	19.2533	28.88
AT5G40340	0.756589	0.00723414	7.94	7.25	11.86	17.9	7.79	15.08	9.01667	13.59
AT1G61100	0.756745	4.31721e-05	31.09	30.42	49.3	57.46	50.44	58.19	36.9367	55.3633
AT5G18470	0.799008	4.20426e-05	17.36	14.05	13.09	24.58	24.76	20.24	14.8333	23.1933
AT1G53903	0.823637	0.0154751	3.43	4.24	4.22	6.31	6.93	5.65	3.96333	6.29667
AT5G58120	0.869827	2.08567e-06	7.64	5.71	8.78	11.23	12.38	12.28	7.37667	11.9633
AT5G05140	0.875529	1.58464e-08	52.64	61.91	73.2	96.86	109.21	100.88	62.5833	102.317
AT5G25050	0.88811	0.000294618	4.87	4.56	5.05	6.38	10.19	7.33	4.82667	7.96667
AT1G22882	0.912392	4.1784e-06	7.8	6.72	11.4	14.3	13.64	15.27	8.64	14.4033
AT2G44500	0.971801	1.86569e-08	26.54	31.8	34.49	62.09	58.31	42.98	30.9433	54.46
AT3G53810	0.976684	6.9618e-07	8.85	6.64	7.63	11.91	15.13	13.52	7.70667	13.52
AT5G65660	1.02697	9.67019e-10	112.59	76.96	108.57	195.01	195.18	151.96	99.3733	180.717
AT1G69890	1.09674	1.88727e-07	32.64	34.92	32.78	50.66	83.16	57.81	33.4467	63.8767
AT4G29950	1.10728	1.75541e-13	108.19	123.7	140.6	219.02	263.34	234.01	124.163	238.79
AT5G22690	1.17454	1.94897e-13	5.55	5.14	5.46	10.47	11.36	10.51	5.38333	10.78
AT1G11050	1.20427	3.21259e-10	7.24	5.33	6.23	13.77	13.91	11.09	6.26667	12.9233
AT5G03360	1.21833	0.843956	0	0	0	0.02	0	0	0	0.00666667
AT2G39650	1.245	1.48929e-07	4.89	4.56	5.56	10.86	12.44	8.3	5.00333	10.5333
AT5G41740	1.27424	4.71309e-12	5.3	3.58	4.94	9.66	10.41	9.68	4.60667	9.91667
AT2G03240	1.29747	1.31188e-22	12.1	11.38	12.93	26.51	26.18	27.27	12.1367	26.6533
AT3G59080	1.3191	1.60332e-11	11.36	10.3	11.04	21.15	30.36	21.27	10.9	24.26
AT3G24530	1.46808	1.47848e-21	11.64	11.44	12.26	30	31.52	26.07	11.78	29.1967
AT1G02816	1.4739	1.49007e-21	34.88	42.63	42.33	98.05	91.48	108.46	39.9467	99.33
AT2G27500	1.49475	4.08226e-18	47.95	59.57	65.48	133.93	168.8	126.26	57.6667	142.997
AT1G72900	1.5312	1.98991e-21	12.92	12.62	14.78	32.6	35.25	36.07	13.44	34.64
AT4G34150	1.58104	1.81278e-18	58.1	35.34	51.79	127.59	142.65	116.55	48.41	128.93
AT1G33760	1.6155	0.144735	0.25	0.12	0.2	0.41	0.74	0.4	0.19	0.516667
AT5G39580	1.68393	3.34843e-19	266.45	190.85	179.74	551.95	700.44	580.87	212.347	611.087
AT1G64610	1.75614	3.002e-26	5.31	5.39	6.51	17.25	18.98	16.22	5.73667	17.4833
AT3G47080	1.86595	3.10993e-35	10.39	12.15	12.23	37.31	36.99	39.12	11.59	37.8067
AT1G03220	1.91536	3.89949e-29	88.51	62.45	70.76	263.6	281.38	204.25	73.9067	249.743
AT5G41100	1.93819	5.36348e-16	9.08	4.4	10.13	26.27	29.43	24.3	7.87	26.6667
AT5G25930	1.94363	1.65092e-23	5.75	5.74	6.12	17.93	25.65	16.93	5.87	20.17
AT1G78850	1.94765	1.45641e-28	146.15	113.83	102.77	405.87	475.37	374.65	120.917	418.63
AT5G41750	1.9851	1.42517e-28	3.01	2.05	2.54	9.02	8.84	8.38	2.53333	8.74667
AT3G26910	2.05982	1.2647e-24	14.02	7.57	14.22	44.3	45.53	42.45	11.9367	44.0933
AT1G66090	2.18192	1.3534e-16	9.13	4.48	4.22	24.56	24.24	23.84	5.94333	24.2133
AT3G55430	2.21905	3.74594e-49	75.98	61.39	79.96	280.8	346.61	273.45	72.4433	300.287
AT4G24160	2.41048	3.05325e-42	16.43	13.85	16.51	68.18	90.99	62.83	15.5967	74
AT5G28237	2.4541	0.0486534	0.09	0.12	0	0.33	0.37	0.37	0.07	0.356667
AT2G29300	2.61718	1.68541e-20	3.58	3.77	3.28	18.46	14.11	25.93	3.54333	19.5
AT5G64190	2.66023	4.34856e-25	1.79	2.98	2.57	12.08	13.7	15.41	2.44667	13.73
AT4G18950	2.66916	1.01041e-41	26.32	27.83	35.82	145.65	222.67	140.15	29.99	169.49
AT1G05675	2.72394	6.02513e-14	4.55	1.56	1.56	11.66	19.05	14.52	2.55667	15.0767
AT2G25460	3.90894	3.51736e-109	3.46	4.9	5.23	67.61	65.24	47.02	4.53	59.9567
AT4G24380	4.38879	4.55178e-143	7.11	6.09	8.21	131.93	149.6	118.98	7.13667	133.503
AT3G01345	5.33247	0.0139335	0.09	0.08	0.18	0.19	0.05	12.09	0.116667	4.11
